# Supplementary material for: Single sample resolution of rare microbial dark matter in a marine invertebrate metagenome
Source: PubMed Central journal article supplement (PMC5041132; doi:10.1038/srep34362), 2016-09-29
Supplement: srep34362-s1.pdf [file srep34362-s1.pdf]

1 Single sample resolution of rare microbial dark  
2 matter in a marine invertebrate metagenome

3  
4 Ian J Miller<sup>1</sup>, Theodore R Weyna<sup>1</sup>, Stephen S Fong<sup>2</sup>, Grace Lim-Fong<sup>3</sup> & Jason C Kwan<sup>1\*</sup>

5  
6 <sup>1</sup>*Pharmaceutical Sciences Division, University of Wisconsin-Madison, Madison, Wisconsin, USA.*

7 <sup>2</sup>*Department of Chemical and Life Science Engineering, Virginia Commonwealth University, Richmond, Virginia,*  
8 *USA.*

9 <sup>3</sup>*Department of Biology, Randolph-Macon College, Ashland, Virginia, USA.*

10  
11 **Supplementary Information**

12  
13  
14 **\*Corresponding author**

15 **email: [jason.kwan@wisc.edu](mailto:jason.kwan@wisc.edu)**

16  
17  
18  
19  
20  
21  
22  
23  
24  
25  
26  
27  
28  
29  
30  
31  
32  
33  
34  
35  
36  
37  
38  
39  
40  
41  
42  
43  
44  
45

## SI Materials and Methods

**DNA extraction and sequencing.** Both *B. neritina* ovicells and larval samples preserved in RNAlater (Sigma) were subjected to a DNA extraction procedure previously optimized for tunicate microbiomes (1). Briefly, ovicells were ground with a mortar and pestle under liquid nitrogen, before being resuspended in 5 mL of 2 mg/mL lysozyme in TE. Larvae were added directly to 5 mL of 2 mg/mL lysozyme in TE. In both cases, extractions were incubated at 30 °C, with shaking, for 1 hr. After this time, 1.2 mL 0.5 M EDTA was added to each tube along with proteinase K (Qiagen, final concentration 0.2 mg/mL), and the mixtures were incubated at 30 °C for 5 min. After addition of 650 µL of 10% SDS, the mixtures were incubated at 37 °C with shaking overnight. NaCl (1.2 mL of 5M) was then added to each tube, along with 1.0 mL of CTAB/NaCl solution (10% CTAB in 0.7 M NaCl), and the tubes were incubated at 65 °C for 20 min. Mixtures were extracted twice with 1:1 phenol/chloroform, and 1 volume of isopropanol was added to the aqueous fraction, which was then stored at 4 °C overnight. Tubes were spun down at 3,220 g for 30 min at 0 °C. Supernatants were carefully removed and 2 mL 70% ethanol in water was added to each tube, before they were spun down again. Supernatants were removed and tubes were inverted for 20 min, before 500 µL of TE was added. The tubes were left overnight at 4 °C to allow DNA to dissolve, before extractions were subjected to repurification by Genomic Tip 100/G (Qiagen), according to the manufacturer's instructions. TruSeq (Illumina) libraries were prepared for both AB1\_ovicells and MHD\_larvae, with ~300 bp inserts. These were subjected to sequencing on an Illumina HiSeq 2000, in paired-end 101 bp runs. Sequence yields are shown in **Supplementary Table 1**.

**RNA extraction and sequencing.** Approximately 40 mg of AB1\_ovicells tissue was ground with a mortar and pestle under liquid nitrogen, and then resuspended in 600 µL buffer RLT (Qiagen) containing 6 µL β-mercaptoethanol. The mixture was homogenized by drawing up and down a sterile 20G needle 15 times, before being spun down at 16,800 g for 3 min. Total RNA was then purified from the crude lysate using the RNeasy Mini kit (Qiagen), utilizing the optional DNase step. The resulting RNA was flash frozen in liquid nitrogen and stored at -80 °C. Prokaryotic and eukaryotic ribosomal RNA was depleted with the RiboZero rRNA removal (Epidemiology) kit (Epicentre), and eukaryotic polyadenylated transcripts were depleted with poly-T beads. RNA in the resulting eluate was recovered and purified with Agencourt RNA Clean XP beads. Stranded RNAseq Illumina libraries were

74 prepared with ~300 bp inserts, and subjected to two Illumina HiSeq 2000 sequencing runs, one paired-end 101 bp  
75 and one paired-end 151 bp. Sequence yields are shown in **Supplementary Table 1**.

76

77 **Metagenomic assembly and deconvolution.** Raw Illumina reads obtained from sequencing both AB1\_ovicells  
78 and MHD\_larvae were filtered with Seqclean (2), using the parameters “-minimum read length 40 -qual 30 30”.  
79 The resulting filtered reads were assembled with SPAdes 3.1.1 (3) using the parameters, “-k 33,55,77 --careful”.  
80 Prodigal (4) was used to call and translate ORFs in contigs obtained from the AB1\_ovicells dataset >3 kbp in  
81 length, using the “-m anon” parameter. The resulting translated sequences were used as queries in massively  
82 parallel BLASTP searches against the NR NCBI database, using a custom pipeline (5) designed to run parallel  
83 blast jobs on a distributed grid using HTCondor (6). Raw blast table outputs were processed with MEGAN (7) to  
84 yield NCBI taxonomy IDs for each ORF. These were used to assign taxonomy classifications to parent contigs  
85 based on majority vote of component ORF taxonomy IDs, prioritizing in descending order of taxonomic  
86 rank/specificity (i.e. species-level classifications were counted, if they were present, before more basal taxonomic  
87 levels were considered). Resulting taxonomy tables were used to visualize assemblies in R (8), using the ggplot2  
88 package.

89 Quality filtered paired-end Illumina reads from the MHD\_larvae dataset were aligned with Bowtie 2 (9) to  
90 all AB1\_ovicells contigs >3 kbp that were classified as belonging to the kingdom Bacteria, using the “--very-  
91 sensitive” end-to-end read alignment option. The coverage of each contig in the resulting alignment was  
92 examined using the BedTools (10) component CoverageBed. Contigs with >1× MHD\_larvae read coverage were  
93 separated and examined in R and found to comprise of two groups of contigs with different coverage and GC  
94 content (**Supplementary Figure 4**). These groups were separated in R with normal mixture modeling using the  
95 package mclust (11). One of these groups was found by single copy marker analysis (see below) to be a  
96 complete bacterial genome assembly identified as *Candidatus Endobugula sertula* due to the presence of *bry*  
97 pathway components and on taxonomic grounds. The other group contained a paucity of bacterial markers and  
98 likely consisted of mis-assigned host contigs.

99 The remaining AB1\_ovicells contigs with <1× MHD\_larvae read coverage were examined for additional  
100 bacterial genomes. Bacterial single copy marker genes were detected using HHMer3 (12) with an HMM database  
101 constructed from the set of PFAM accessions recently used by Rinke *et al.* to assess the genome completeness

102 of divergent single-cell genomes (13). HMM results were filtered using the cutoffs used by Rinke *et al.* (14) and  
103 contigs containing marker genes were annotated in the previously constructed taxonomy table. Contigs containing  
104 single copy markers were separated in R, and subjected to normal mixture modeling with the mclust package (11)  
105 to yield 11 clusters. Contig sets belonging to each cluster were separated and assessed for genome  
106 completeness (13). These cluster classifications were used to assist in the binning of other contigs by  
107 tetranucleotide frequency analysis (15) using ESOM (16) (**Supplementary Figure 7**). After tetranucleotide  
108 frequencies for all contigs were calculated and processed in ESOM, bins were constructed such that all marker-  
109 containing contigs were included, capturing other contigs with similar tetranucleotide frequencies. In some cases,  
110 clusters identified by normal mixture modeling did not form discrete groups on the ESOM-map. In these cases,  
111 outliers were excluded. The resulting genome assembly bins were subjected to an iterative assembly protocol,  
112 where the raw (unfiltered) HiSeq reads were realigned to contigs with Bowtie 2 (9) using the parameters "--end-  
113 to-end --very-sensitive --no-discordant --no-unal", followed by reassembly of all aligned reads and their pairs  
114 except for unpaired reads that aligned more than twice the library insert size from the ends of contigs. Only three  
115 genome bins (AB1\_chromatiales, AB1\_phaeo and AB1\_rickettsiales) were significantly improved by this  
116 procedure (**Table 1, Main Paper, and Table S6**).

117

118 **PCR amplification and screening to confirm connectivity between contigs.** Primers (**Table S4**) were  
119 designed to have an annealing temperature of ~55 °C manually and using and the Primer3 algorithm (17) to test  
120 various aspects of genomic assemblies. For a 10 µL reaction matrix the following volumes and concentrations of  
121 each component were used: 5 µL 2× KOD Buffer, 2 µL 2 mM dNTPs, 0.2 µL KOD Xtreme Hot Start DNA  
122 Polymerase (Novagen), 1 µL 3 µM forward primer, 1 µL 3 µM reverse primer, and 0.8 µL template. Reactions  
123 were carried out on a Bio-Rad C1000 Touch Thermal Cycler in 8 vial 200 µL strip tubes using a thermocycle  
124 program consisting of 94 °C for 2 min, then 35 cycles of (98 °C for 10 s, 55 °C for 30 s, custom extension time [1  
125 min per kbp expected product] at 68 °C), then 68 °C for 10 min with an indefinite hold at 12 °C upon thermocycle  
126 completion.

127

128 **Bacterial genome annotation and RNAseq alignment.** RNAseq sequencing data was filtered with Seqclean,  
129 using the parameter "-polyat". The resulting filtered reads were aligned with Bowtie 2 (9) to contigs in each

130 bacterial genome bin using the end-to-end alignment options "--very-sensitive --no-discordant --no-unal". To  
131 investigate the apparent intervening sequence in the AB1\_lowgc 16S rRNA gene, the alignment was repeated  
132 with the gap-aware aligner Tophat2 (18) using the parameters "--b2-very-sensitive --library-type fr-firststrand". The  
133 AB1\_lowgc 16S rRNA region was also aligned to a structural model of the bacterial small ribosomal subunit using  
134 SSU-Align (19) (**Supplementary Figure 23**). For functional annotation, fasta files containing the sequences of  
135 contigs classified into their respective bins were annotated with the Prokka pipeline (20). For AB1\_lowgc, the  
136 genbank file generated by Prokka was combined with RNAseq alignment files in Geneious (Biomatters Ltd.) to  
137 visualize transcript abundance. Reads aligned to each ORF were counted in Geneious, and for each gene  
138 normalized RPKMO (reads per kilobasepair of gene per million reads aligning to annotated ORFs in the  
139 AB1\_lowgc genome) (21) values were calculated.

140

141 **Construction of assembly phylogenetic trees.** AMPHORA (22) was used to scan genome assemblies for  
142 phylogenetic marker genes, which were extracted and manually examined to resolve instances of multiple hits.  
143 The marker genes were individually aligned to the internal reference database supplied with AMPHORA. The set  
144 of individual marker alignments were filtered such that only reference genomes with >75% of the marker genes  
145 were retained, and then marker genes represented in <75% of these genomes were removed. The marker  
146 alignments were concatenated, and residues not aligning to AMPHORA's HMM models, signified by lowercase  
147 residues in the resulting alignment file, were removed from the alignment. Trees were then constructed with  
148 FastTree 2 (23) using the parameters "-gamma -slow -spr 10 -mlacc 3 -bionj". After FastTree 2 runs were  
149 complete, accession numbers were substituted for strain designations according to entries in the RefSeq  
150 database. All trees were rooted arbitrarily at the divergence of the phylum Deinococcus-Thermus and other  
151 bacteria, as others have done previously (22). Trees were manipulated using the Interactive Tree of Life server  
152 (24).

153

154 **Construction of 16S rRNA phylogenetic trees.** For AB1\_phaeo, AB1\_endozoicomonas and AB1\_endobugula,  
155 16S rRNA sequences for all type strains in the same order suggested by taxonomic classifications of contigs in  
156 the respective genome bin were downloaded from the Ribosomal Database Project (RDP) website (25), in aligned  
157 format. Because AB1\_div, AB1\_rickettsiales and AB1\_lowgc showed inconsistent contig taxonomy classification

158 at the order level, comparison sequences were selected based on inferences from marker gene alignment trees  
159 (see above). These were downloaded from the SILVA database (26), as this database contains putative  
160 classifications for many sequences from uncultured sources in the PVC superphylum, candidate division NPL-  
161 UPA2 and the SAR11 clade. Sequence sets were uploaded to the RDP website for alignment, and the results  
162 were inspected manually in ClustalX and trimmed. FastTree 2 (23) was used to construct the trees, using the  
163 parameters “-slow -spr 5 -mlacc 3 -gamma -gtr -nt”, and manipulated using the iTOL server (24).

164

165 **Taxonomic assignment of genome assemblies.** Taxonomic assignments (**Table 2, Main Paper**) were based  
166 on 16S rRNA sequence, where available. These sequences were used as queries in BLASTN searches against  
167 the SILVA database (26) to identify the closest relative. If the BLAST alignment encompassed the full length of  
168 the query sequence, the reported alignment identity was used for classification. Otherwise, the full sequence and  
169 its closest relative identified by BLAST were realigned in Geneious. Taxonomic assignments in relation to the  
170 SILVA or NCBI taxonomy of the closest relative were generated in accordance with the 16S identity thresholds  
171 suggested by *Yarza et al.* (27), species: 98.7%, genus: 94.5%, family: 86.5%, order: 82.0%, class: 78.5% and  
172 phylum: 75.0%.

173

174 **Assessment of codon reassignment in AB1\_lowgc.** We used a procedure recently utilized in a study of stop  
175 codon reassignments in metagenomic sequences (28) to determine whether AB1\_lowgc used genetic code 4 (as  
176 the mycoplasmas do) or genetic code 11 (as the phytoplasmas do). Briefly, we ran the AB1\_lowgc chromosome  
177 sequence through the gene-finding program Prodigal (4) twice, first using genetic code 4 and then using genetic  
178 code 11. The ORFs assigned with both of these codes showed similar average lengths and cumulative scores  
179 (cscore, Supplementary Table 9), similar to *Ca. Phytoplasma australiense*. By contrast, the same procedure  
180 carried out on the genome of *Mycoplasma pneumoniae* showed a large reduction in both average ORF length  
181 and cscore when code 11 was used, versus code 4. Our results therefore do not show evidence of codon  
182 reassignment in the genome of AB1\_lowgc.

183

184 **Analysis of PVC superphylum signature proteins and indels in AB1\_div.** All instances of the PVC  
185 superphylum signature protein identified by Lagkourdos *et al.* (29) were downloaded from the NCBI database,

186 and used as BLASTP queries against the predicted proteins of AB1\_div. The top hit was used as a BLASTP  
187 query against NR, and the top hit in that search was found to be the PVC signature protein from *Candidatus*  
188 *Kuenenia stuttgartiensis* (Accession CAJ71823.1). Marker genes with characteristic insertions or deletions in the  
189 PVC superphylum as well as signature proteins for the phylum Chlamydiae identified by Gupta *et al.* (30, 31) were  
190 downloaded from the NCBI database and used as BLASTP queries against the predicted proteins of AB1\_div.  
191 Putative hits were examined to determine if they were true homologs of the relevant gene, then aligned with the  
192 entire set in ClustalX (using the BLOSUM protein weight matrix), to determine if the AB1\_div protein shared  
193 certain insertions or deletions.

194

195 **Amplicon sequencing.** A ~430 bp section of 16S rRNA genes was amplified from DNA extracts using primers S-  
196 D-Bact-0341-b-S-17 and S-D-Bact-0785-a-A-21 (38) (Supplementary Table 4) with additional custom 5' ends  
197 specific to each sample. This custom section included MiSeq adapter sequences and a sample-identifying  
198 barcode sequence. Pooled amplicons were sequenced on an Illumina MiSeq instrument in a 2 × 250 bp paired-  
199 end run, expected to yield overlapping reads. Demultiplexed sequence read pairs were joined with Flash (32) and  
200 analyzed with QIIME (33). For downstream analysis, OTUs that did not have abundance >1 read in at least one  
201 sample were removed. Abundance of specific bacteria were measured by identifying OTUs that had 98.7%  
202 identity to the assembled or Sanger sequence.

203

204 **Functional analysis of metatranscriptome data.** Translated predicted protein sequences from the annotations of  
205 the AB1\_lowgc genome bin were used as queries in BLASTP searches against the NR database (see

206 **Metagenomic assembly and deconvolution**, above). The resulting BLAST result table was used as input to  
207 MEGAN (7), which was used to assign KEGG functional categories to protein sequences. KEGG trees were  
208 uncollapsed two levels in MEGAN, and all assignments except for “Organismal systems” and “Human diseases”  
209 were exported to a csv file (with the columns “Read name” and “KEGG name”). Pre-calculated RPKMO values  
210 and the MEGAN csv table were used to calculate proportions of the bin’s transcriptome that corresponded to each  
211 KEGG category. Where multiple KEGG categories were assigned to one predicted gene, that gene’s RPKMO  
212 value was split equally among the assigned categories.

213

214  
215  
216

- 217 1. Schmidt EW, Donia MS (2009) Chapter 23 Cyanobactin ribosomally synthesized peptides—A case of deep  
218 metagenome mining. *Methods in Enzymology* **458**:575–596.
- 219 2. Zhbannikov IY, Hunter SS, Settles ML (2013) SeqyClean User Manual, available at:  
220 <https://github.com/ibest/seqyclean>. [Accessed: June 22 2015].
- 221 3. Bankevich A, et al. (2012) SPAdes: A new genome assembly algorithm and its applications to single-cell  
222 sequencing. *J Comp Biol* **19**(5):455–477.
- 223 4. Hyatt D, LoCascio PF, Hauser LJ, Uberbacher EC (2012) Gene and translation initiation site prediction in  
224 metagenomic sequences. *Bioinf* **28**(17):2223–2230.
- 225 5. CHTC's BLAST Pipeline - Center for High Throughput Computing Available at:  
226 [http://chtc.cs.wisc.edu/blast\\_SOARguide.shtml](http://chtc.cs.wisc.edu/blast_SOARguide.shtml) [Accessed June 22, 2015].
- 227 6. HTC Condor Available at: <http://research.cs.wisc.edu/htcondor/index.html> [Accessed June 22, 2015].
- 228 7. Huson DH, Weber N (2013) Microbial community analysis using MEGAN. *Methods in Enzymology*. **531**:465–  
229 485.
- 230 8. Gentleman R, Ihaka R, Bates D, Others (2009) The R project for statistical computing. URL: [http://www-r-](http://www-r-project.org/254)  
231 [project.org/254](http://www-r-project.org/254). [Accessed: June 24 2015].
- 232 9. Langmead B, Salzberg SL (2012) Fast gapped-read alignment with Bowtie 2. *Nat Methods* **9**(4):357–359.
- 233 10. Quinlan AR, Hall IM (2010) BEDTools: A flexible suite of utilities for comparing genomic features. *Bioinf*  
234 **26**(6):841–842.
- 235 11. Fraley C, Raftery AE (2002) Model-based clustering, discriminant analysis, and density estimation. *J Am Stat*  
236 *Assoc* **97**(458):611–631.
- 237 12. Mistry J, Finn RD, Eddy SR, Bateman A, Punta M (2013) Challenges in homology search: HMMER3 and  
238 convergent evolution of coiled-coil regions. *Nucl Acids Res* **41**(12):e121.
- 239 13. Rinke C, et al. (2013) Insights into the phylogeny and coding potential of microbial dark matter. *Nature*  
240 **499**(7459):431–437.
- 241 14. Wilson MC, et al. (2014) An environmental bacterial taxon with a large and distinct metabolic repertoire.  
242 *Nature* **506**(7486):58–62.
- 243 15. Dick GJ, et al. (2009) Community-wide analysis of microbial genome sequence signatures. *Genome Biol*  
244 **10**(8):R85.
- 245 16. Ultsch A, Mörchen F (2005) ESOM-Maps: Tools for clustering, visualization, and classification with Emergent  
246 SOM. Technical report Available at: [http://www.informatik.uni-](http://www.informatik.uni-marburg.de/~databionics/papers/ultsch05esom.pdf)  
247 [marburg.de/~databionics/papers/ultsch05esom.pdf](http://www.informatik.uni-marburg.de/~databionics/papers/ultsch05esom.pdf). [Accessed: June 22 2015].
- 248 17. Untergasser A, et al. (2012) Primer3—new capabilities and interfaces. *Nucl Acids Res* **40**(15):e115–e115.
- 249 18. Kim D, et al. (2013) TopHat2: Accurate alignment of transcriptomes in the presence of insertions, deletions  
250 and gene fusions. *Genome Biol* **14**(4):R36.
- 251 19. Nawrocki EP (2009) *Structural RNA homology search and alignment using covariance models*. Ph.D. thesis  
252 (Washington University in St. Louis).



- 253 20. Seemann T (2014) Prokka: Rapid prokaryotic genome annotation. *Bioinf* **30**(14):2068–2069.
- 254 21. Mandlik A, et al. (2011) RNA-Seq-based monitoring of infection-linked changes in *Vibrio cholerae* gene  
255 expression. *Cell Host Microb* **10**(2):165–174.
- 256 22. Wu M, Eisen JA (2008) A simple, fast, and accurate method of phylogenomic inference. *Genome Biol*  
257 **9**(10):R151.
- 258 23. Price MN, Dehal PS, Arkin AP, Others (2010) FastTree 2—approximately maximum-likelihood trees for large  
259 alignments. *PLoS One* **5**(3):e9490.
- 260 24. Letunic I, Bork P (2011) Interactive Tree Of Life v2: Online annotation and display of phylogenetic trees made  
261 easy. *Nucl Acids Res* **38**:W475–8.
- 262 25. Cole JR, et al. (2014) Ribosomal Database Project: Data and tools for high throughput rRNA analysis. *Nucl*  
263 *Acids Res* **42**(D1):D633–42.
- 264 26. Quast C, et al. (2013) The SILVA ribosomal RNA gene database project: Improved data processing and web-  
265 based tools. *Nucl Acids Res* **41**(D1):D590–596.
- 266 27. Yarza P, et al. (2014) Uniting the classification of cultured and uncultured bacteria and archaea using 16S  
267 rRNA gene sequences. *Nat Rev Microbiol* **12**(9):635–645.
- 268 28. Ivanova NN, et al. (2014) Stop codon reassignments in the wild. *Science* **344**(6186):909–913.
- 269 29. Lagkouvardos I, M.-A. J, Rattei T, Horn M (2013) Signature protein of the PVC superphylum. *Appl Environ*  
270 *Microbiol* **80**(2):440–445.
- 271 30. Gupta RS, Bhandari V, Naushad HS (2012) Molecular signatures for the PVC clade (Planctomycetes,  
272 Verrucomicrobia, Chlamydiae, and Lentisphaerae) of bacteria provide insights into their evolutionary  
273 relationships. *Front Microbiol* **3**:327.
- 274 31. Gupta RS, Griffiths E (2006) Chlamydiae-specific proteins and indels: Novel tools for studies. *Trends*  
275 *Microbiol* **14**(12):527–535.
- 276 32. Magoč T, Salzberg SL (2011) FLASH: Fast length adjustment of short reads to improve genome assemblies.  
277 *Bioinf* **27**(21):2957–2963.
- 278 33. Caporaso JG, et al. (2010) QIIME allows analysis of high-throughput community sequencing data. *Nat*  
279 *Methods* **7**(5):335–336.
- 280 34. Hyatt D, et al. (2010) Prodigal: Prokaryotic gene recognition and translation initiation site identification. *BMC*  
281 *Bioinf* **11**:119.
- 282 35. Miller CS, Baker BJ, Thomas BC, Singer SW, Banfield JF (2011) EMIRGE: Reconstruction of full-length  
283 ribosomal genes from microbial community short read sequencing data. *Genome Biol* **12**(5):R44.
- 284 36. Weisburg WG, Barns SM, Pelletier DA, Lane DJ (1991) 16S ribosomal DNA amplification for phylogenetic  
285 study. *J Bacteriol* **173**(2):697–703.
- 286 37. Reysenbach AL, Giver LJ, Wickham GS, Pace NR (1992) Differential amplification of rRNA genes by  
287 polymerase chain reaction. *Appl Environ Microbiol* **58**(10):3417–3418.
- 288 38. Klindworth A, et al. (2013) Evaluation of general 16S ribosomal RNA gene PCR primers for classical and  
289 next-generation sequencing-based diversity studies. *Nucl Acids Res* **41**(1):e1.
- 290 39. Amann RI, et al. (1990) Combination of 16S rRNA-targeted oligonucleotide probes with flow cytometry for  
291 analyzing mixed microbial populations. *Appl Environ Microbiol* **56**(6):1919–1925.

- 292 40. Haygood MG, Davidson SK (1997) Small-subunit rRNA genes and *in situ* hybridization with oligonucleotides  
293 specific for the bacterial symbionts in the larvae of the bryozoan *Bugula neritina* and proposal of "*Candidatus*  
294 *endobugula sertula*." *Appl Environ Microbiol* **63**(11):4612–4616.
- 295 41. Wu Y-W, Tang Y-H, Tringe SG, Simmons BA, Singer SW (2014) MaxBin: An automated binning method to  
296 recover individual genomes from metagenomes using an expectation-maximization algorithm. *Microbiome*  
297 **2**:26.

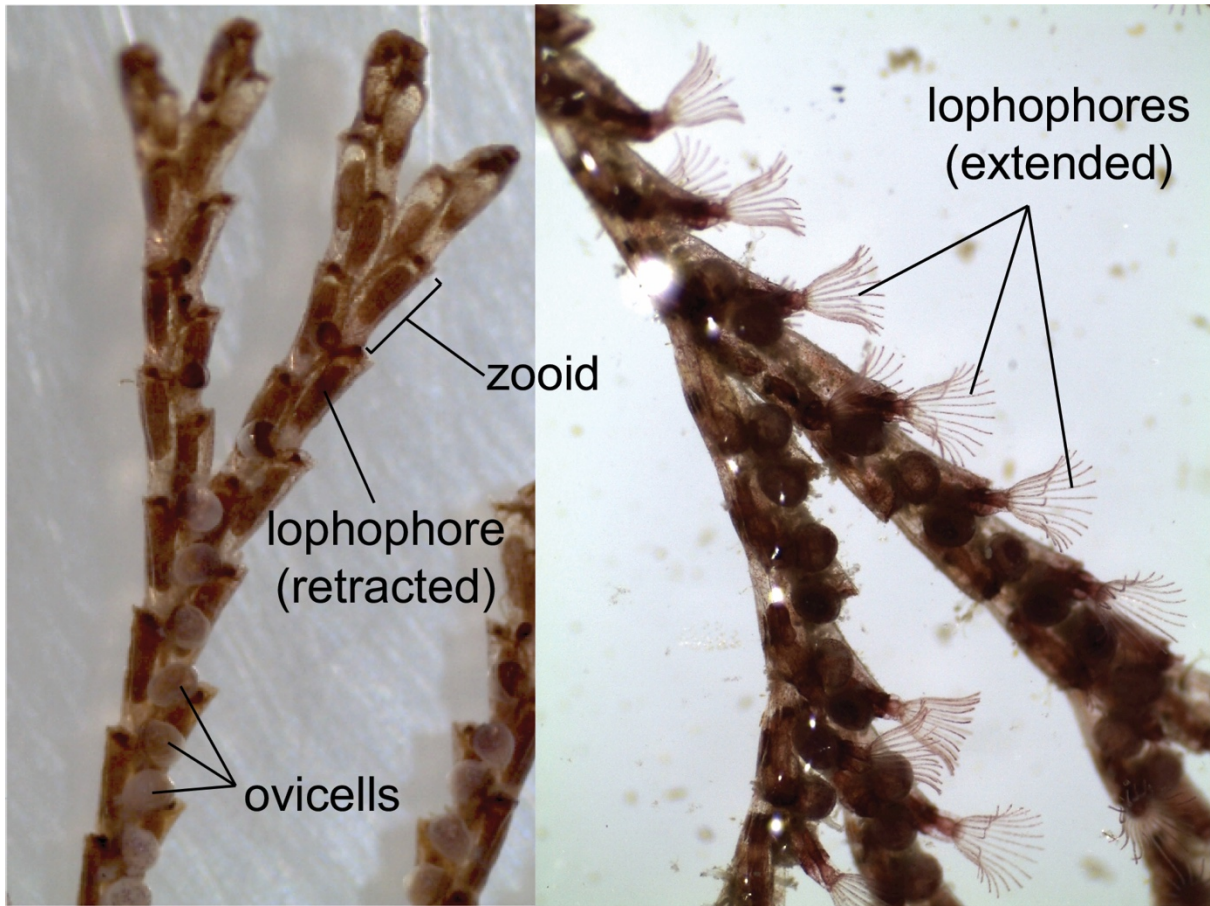

**Supplementary Figure 1: Micrograph showing the morphology of zooids and ovicells in *B. neritina* colony.** The colony consists of clonal zooids specialized for feeding, substrate attachment and reproduction. Feeding zooids capture suspended particles from the water through movement of their lophophore. Reproductive zooids hold a fertilized embryo inside an ovicell until the mature larva is released. The adult animal is covered in a protective layer of chitin, but the larvae are undefended except for chemical defenses (the bryostatins) produced by a vertically transmitted symbiont, *Candidatus Endobugula sertula*.

### 1. De novo metagenome assembly

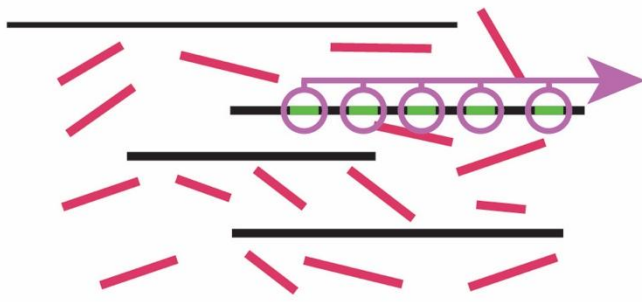

Assemble with SPAdes, remove short contigs

### 2. Assign preliminary taxonomy

Call ORFs  
BLASTP against NR  
Assign ORF taxonomy  
Assign Contig taxonomy  
Remove nonbacterial contigs

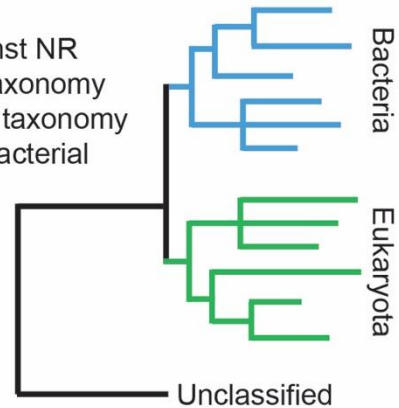

### 3. Assembly simplification

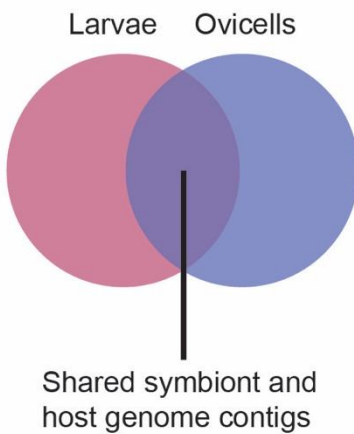

### 4. Automated clustering

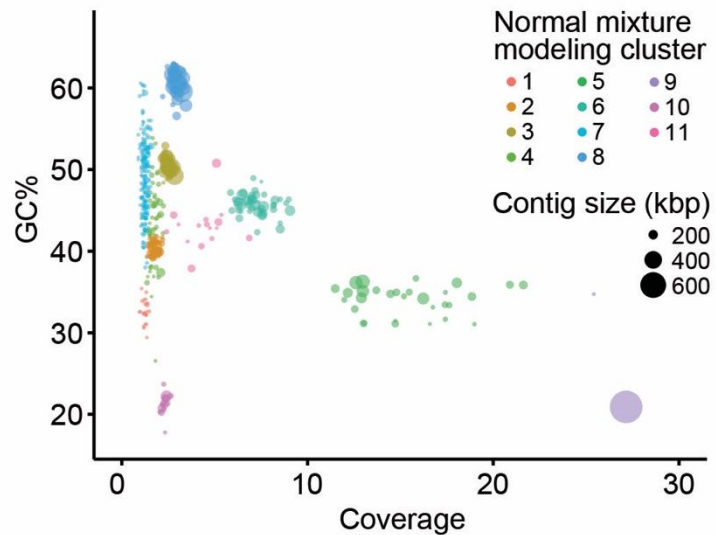

### Supplementary Figure 2: Overview of metagenomic assembly and deconvolution process.

Overview of assembly and deconvolution process. **1.** Paired-end Illumina reads, obtained from AB1\_ovicells DNA, were assembled, and contigs <3,000 bp were discarded. **2.** ORFs were called, translated, and used as queries in a BLASTP search against the NCBI database. The BLAST results were used to assign preliminary taxonomy to contigs. **3.** Paired-end Illumina reads, obtained from MHD\_larvae DNA, were aligned to AB1\_ovicells contigs classified in step 2 as belonging to the kingdom Bacteria, in order to identify conserved symbiont and host sequences. **4.** Bacterial contigs from AB1\_ovicells that were not shared with MHD\_larvae were searched for bacterial single-copy marker genes (13). Contigs containing markers were automatically clustered using normal mixture modeling (11). These clusters were used to assist binning of additional contigs based on tetranucleotide frequency.

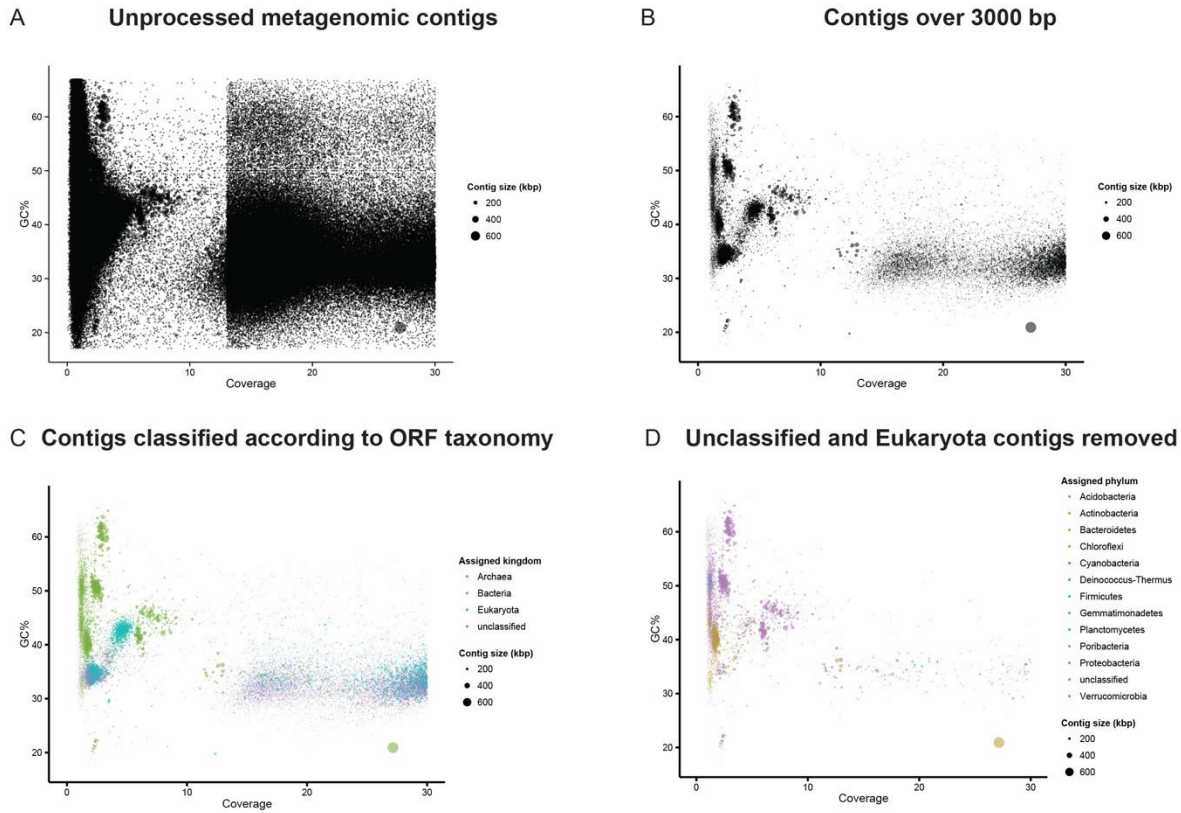

**Supplementary Figure 3: Initial processing of AB1\_ovicells metagenome.** **A.** View of a portion of the unprocessed metagenome. **B.** In the first step, contigs with length <3,000 bp were removed. ORFs were called with Prodigal (34), and the translations were used as queries in BLASTP searches against the NCBI database. **C.** Contig taxonomies were assigned from the BLAST results with MEGAN (7) (see **Materials and Methods**). **D.** These taxonomy assignments were used to remove all contigs that were unclassified at the kingdom level or were classified as belonging to kingdom Eukaryota, which likely comprised of the host genome and other contaminating eukaryotic organisms.

**A** Contigs shared with MHD\_larvae identified

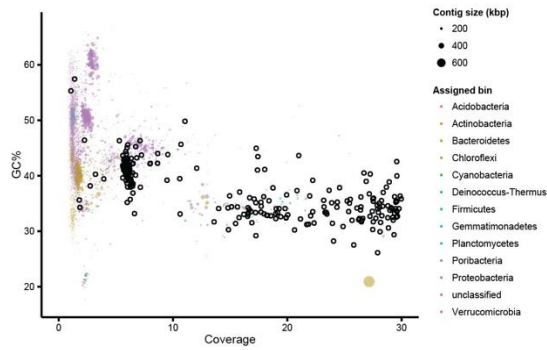

**B** Shared contigs, clustered automatically

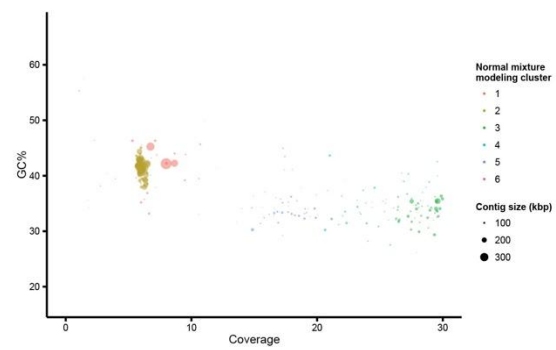

**Supplementary Figure 4: Simplification of AB1\_ovicells metagenome by comparison with MHD\_larvae.**

Shotgun metagenomic sequence reads belonging to the MHD\_larvae sample were aligned to bacterial contigs from the AB1\_ovicells assembly. Contigs with  $>1\times$  coverage with MHD\_larvae reads were identified (**A**, circled in black) and separated. Distinct groups of contigs clustered according to coverage and GC% (**B**). These groups were assigned automatically using normal mixture modeling (11). Based on assigned contig and ORF taxonomy (Fig. S5), single-copy marker analysis, marker gene and 16S rRNA phylogeny, groups 1–2 were subsequently denoted AB1\_endobugula (*Candidatus* Endobugula sertula). Groups 3–6 had mixed taxonomy (Fig. S5), including many ORFs classified as belonging to kingdom Eukaryota, and may represent contigs belonging to the host genome.

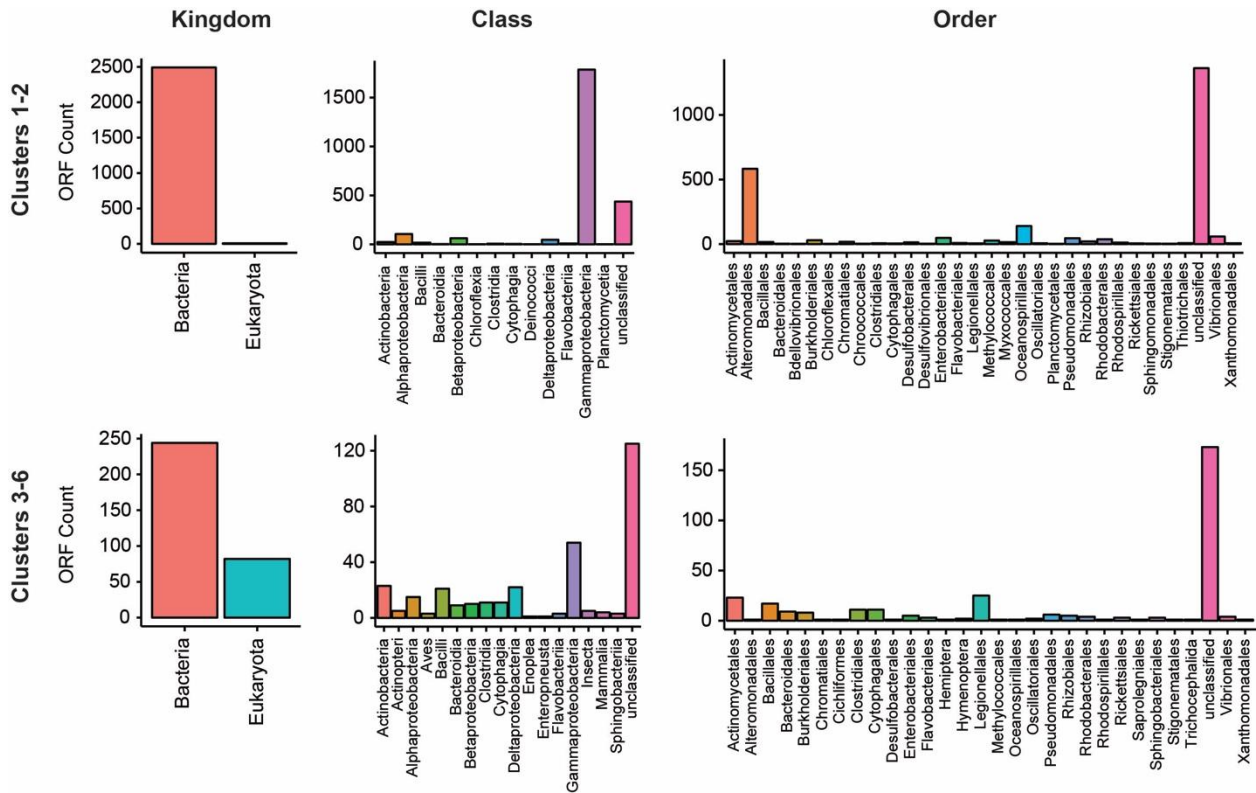

**Supplementary Figure 5: Contigs shared between AB1\_ovicells and MHD\_larvae are automatically clustered into taxonomically distinct groups.** Following normal mixture modeling (11) on the basis of coverage and GC% (Fig. S4), clusters 1 and 2 contain ORFs predominantly classified as gammaproteobacteria of the order Alteromonadales, consistent with the known phylogeny of *Ca. E. sertula* (see **top row**). By contrast, clusters 3–6 contain ORFs that are predominantly unclassified at phylogenetic levels below kingdom, with little consistency among classified ORFs (see **bottom row**).

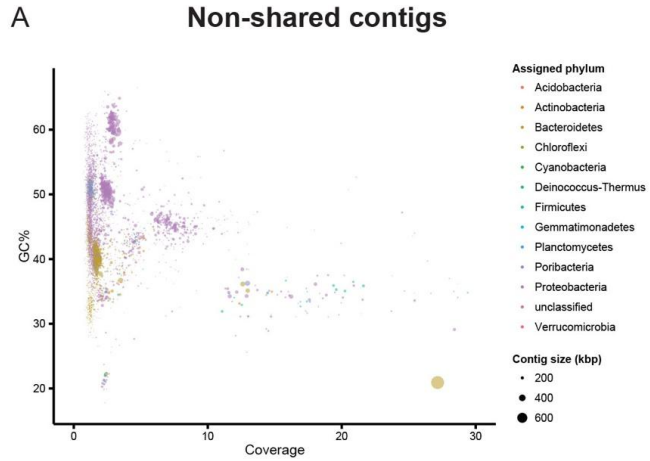

**B Contigs containing single-copy markers**

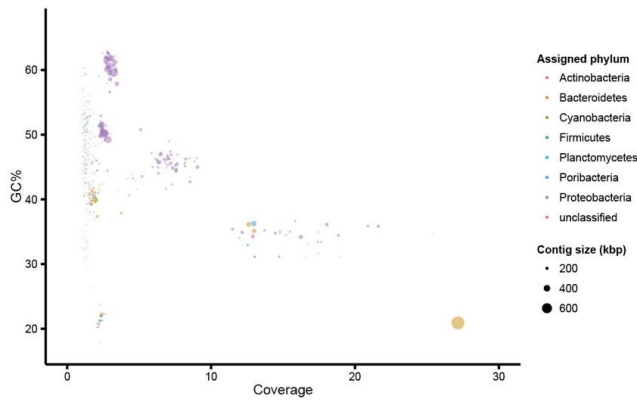

**C Marker contigs, clustered automatically**

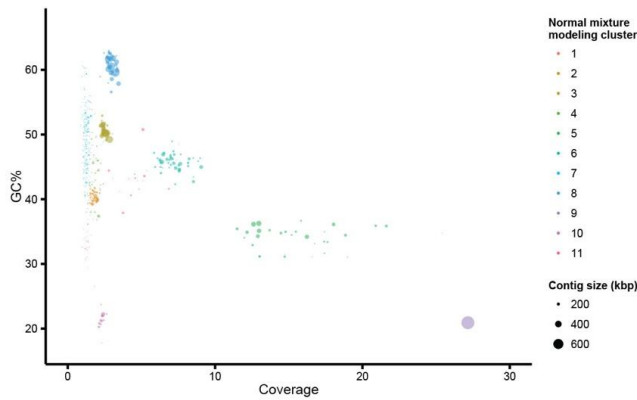

**Supplementary Figure 6: Deconvolution of contigs unique to AB1\_ovicells.** Contigs unique to AB1\_ovicells were separated (**A**), and bacterial single-copy marker genes were detected with the HMM models used in Rinke *et al.* (13). Contigs containing bacterial marker genes (**B**) were independently clustered using normal mixture modeling (11) (**C**).



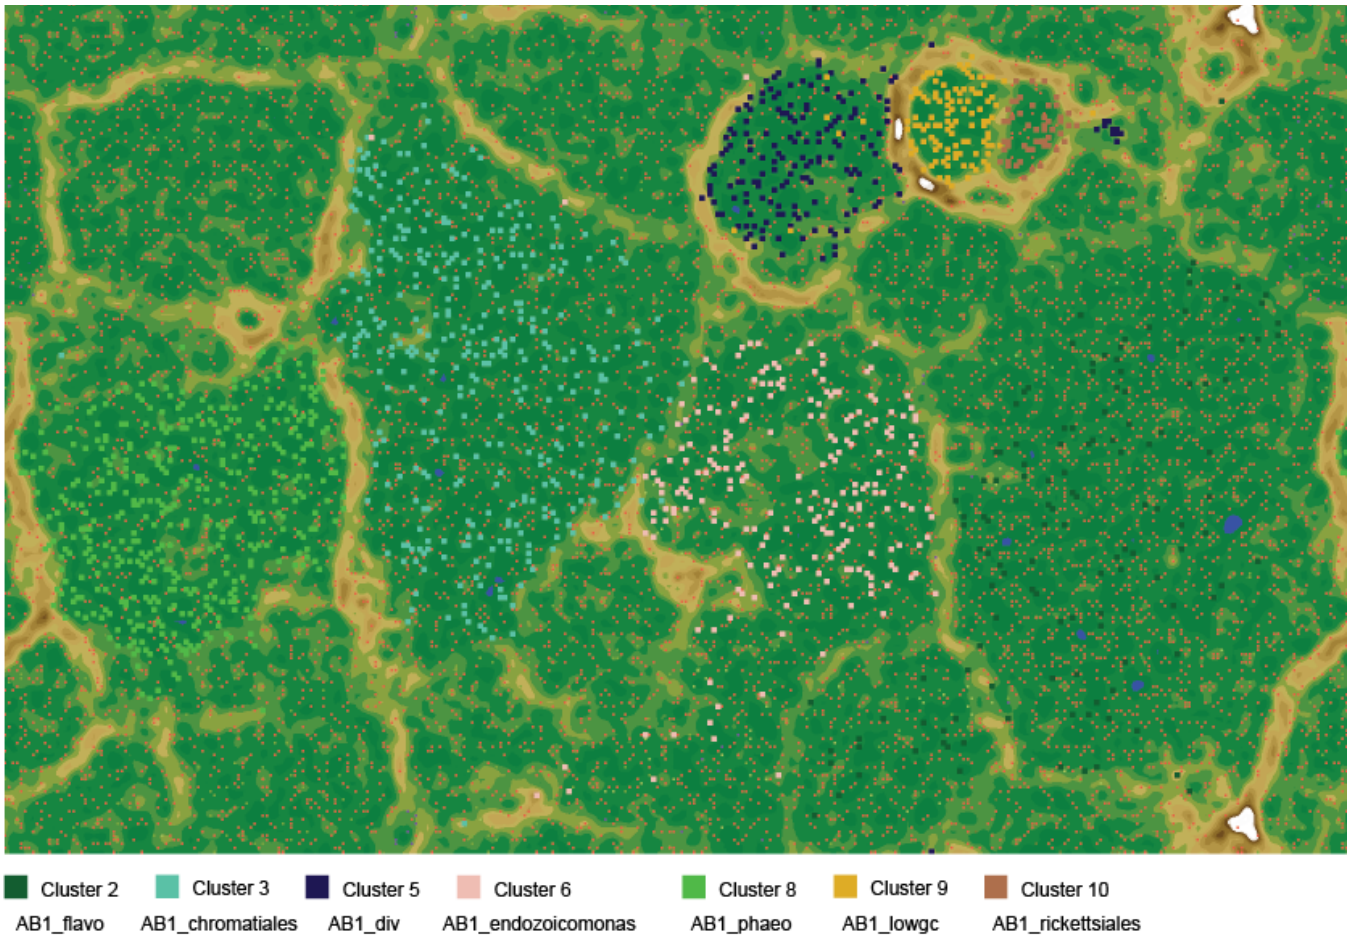

**Supplementary Figure 7: AB1\_ovicells contigs >3,000 bp in length, classified as bacterial but not found in MHD\_larvae, were searched for bacterial single copy marker genes (see Materials and Methods).** The subset of contigs containing single copy marker genes were clustered with normal mixture modeling (11) (**Fig. S2**). The ESOM-map (16) resulting from analysis of the complete set of contigs with and without marker genes is shown above. Points belonging to marker-containing genes are highlighted, with numbers corresponding to those shown in **Fig. 1, Main Paper**, and their ultimate bin names shown. The areas defined by these marker-containing contigs on the ESOM-map were used to bin additional contigs that did not contain marker genes. Additionally, marker-containing contigs that showed tetranucleotide composition dissimilar to the rest of the cluster were discarded from the bin (for example, see cluster 6). The completely assembled AB1\_lowgc chromosome (cluster 9) was included as a control.

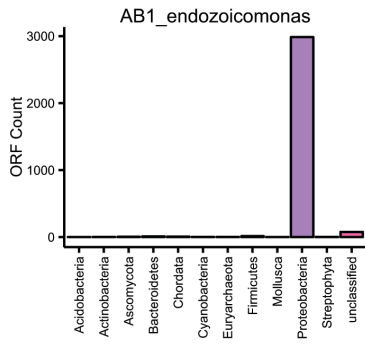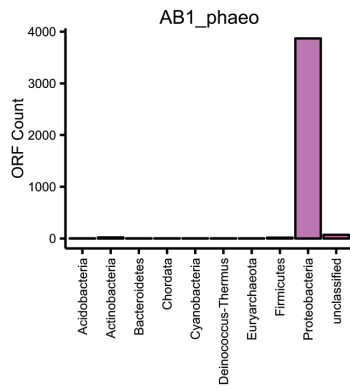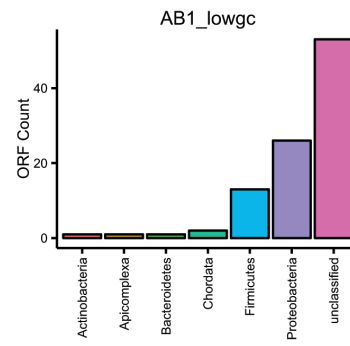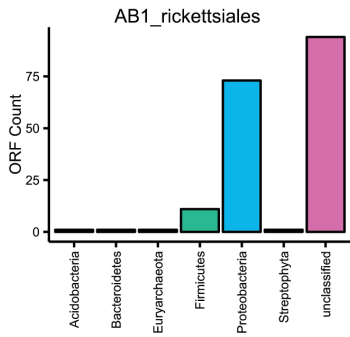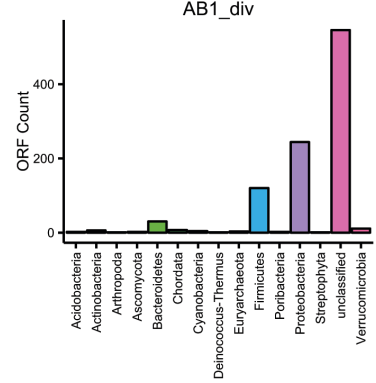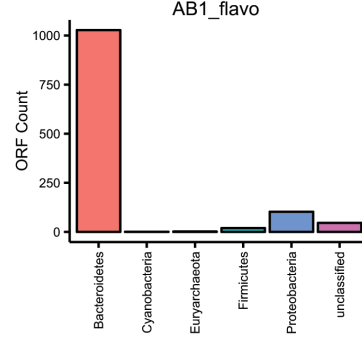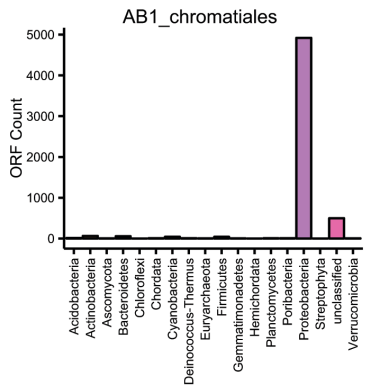

**Supplementary Figure 8: Four bacterial genome assembly bins contain ORFs with high taxonomic fidelity, and the other three have low similarity to known sequences and exhibit low fidelity in the taxonomic classification of their ORFs.** The histograms above show the phylum-level classification of ORFs in each genome bin. The three divergent genomes (AB1\_lowgc, AB1\_rickettsiales and AB1\_div) are dominated by ORFs unclassified at the phylum level, with others showing inconsistent phylum-level classification.

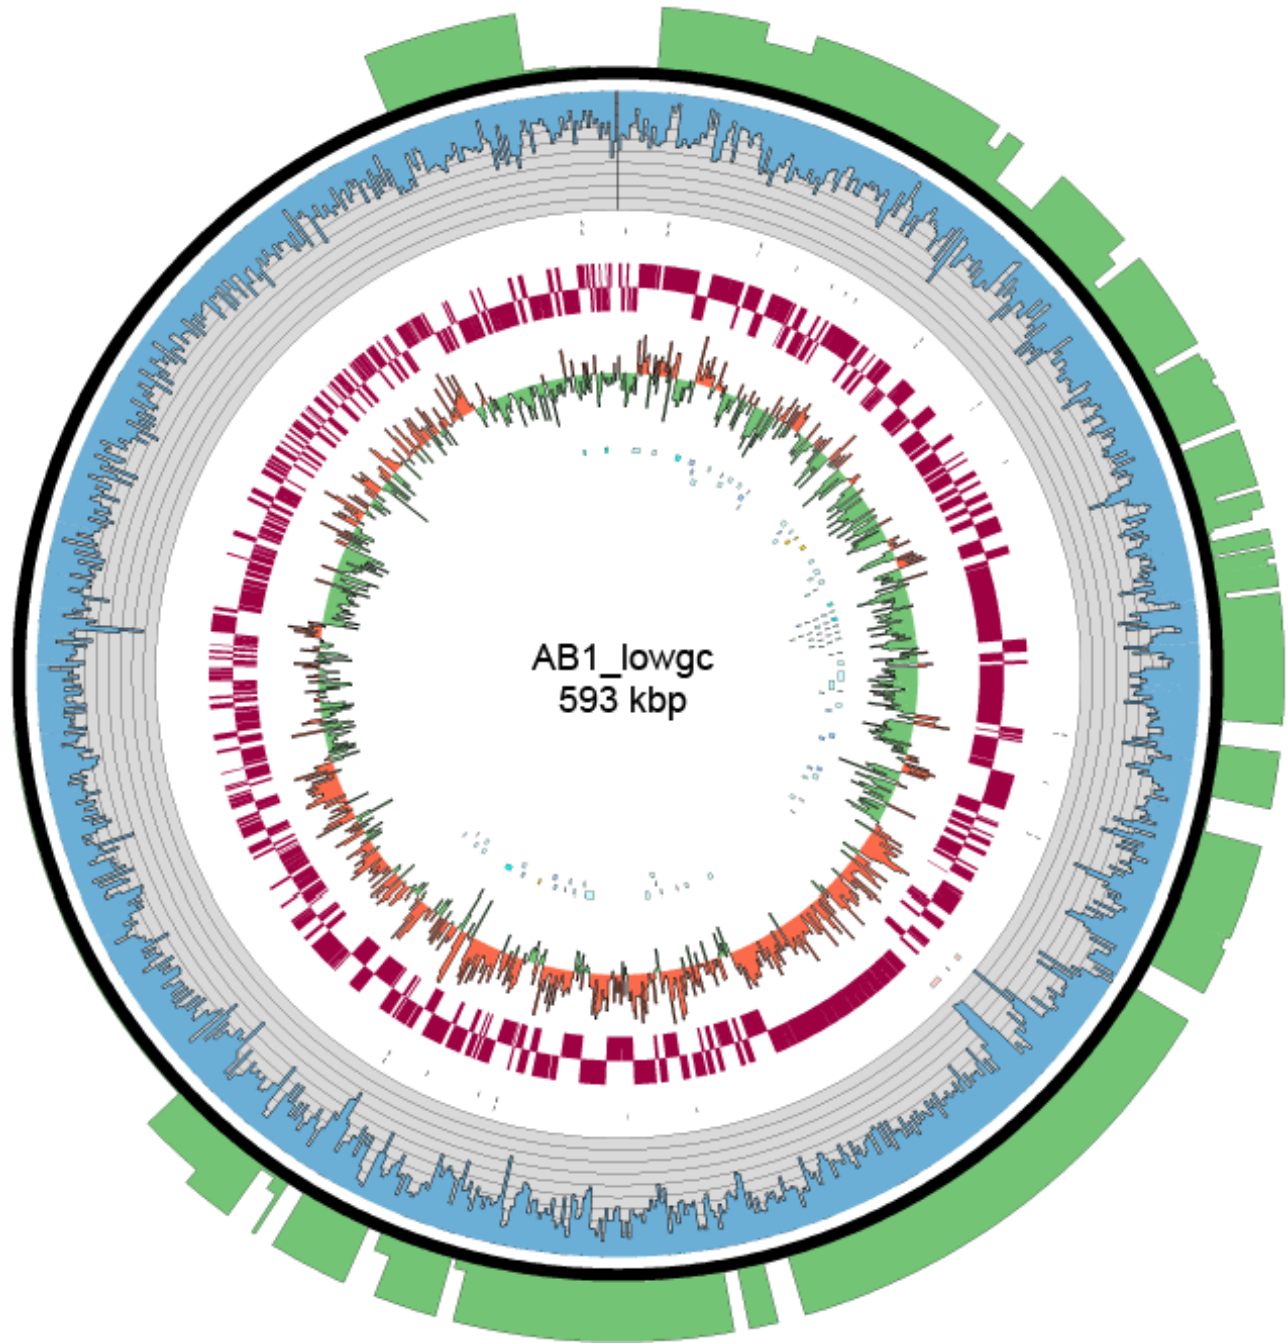

**Supplementary Figure 9: Circular map of the AB1\_lowgc genome and genome features.** Circles correspond to the following (from outermost): (i) bar graph showing number of BLAST hits when translated ORFs are queried against the NR database (from 0, inner, to 500, outer). Only 139 out of 610 (22.8%) predicted coding genes had any BLASTP hits with e-values  $<1 \times 10^{-5}$ ; (ii) GC% using a 500-bp window size (scale from 0, outer, to 100%, inner); (iii) tiles showing the location of predicted noncoding RNA genes; (iv) red heatmap showing the locations of predicted forward ORFs (outer) and reverse ORFs (inner); (v) plot of GC skew  $(G - C)/(G + C)$  using a 500-bp window size; (vi) tiles showing the location of predicted protein coding genes with assigned functions.

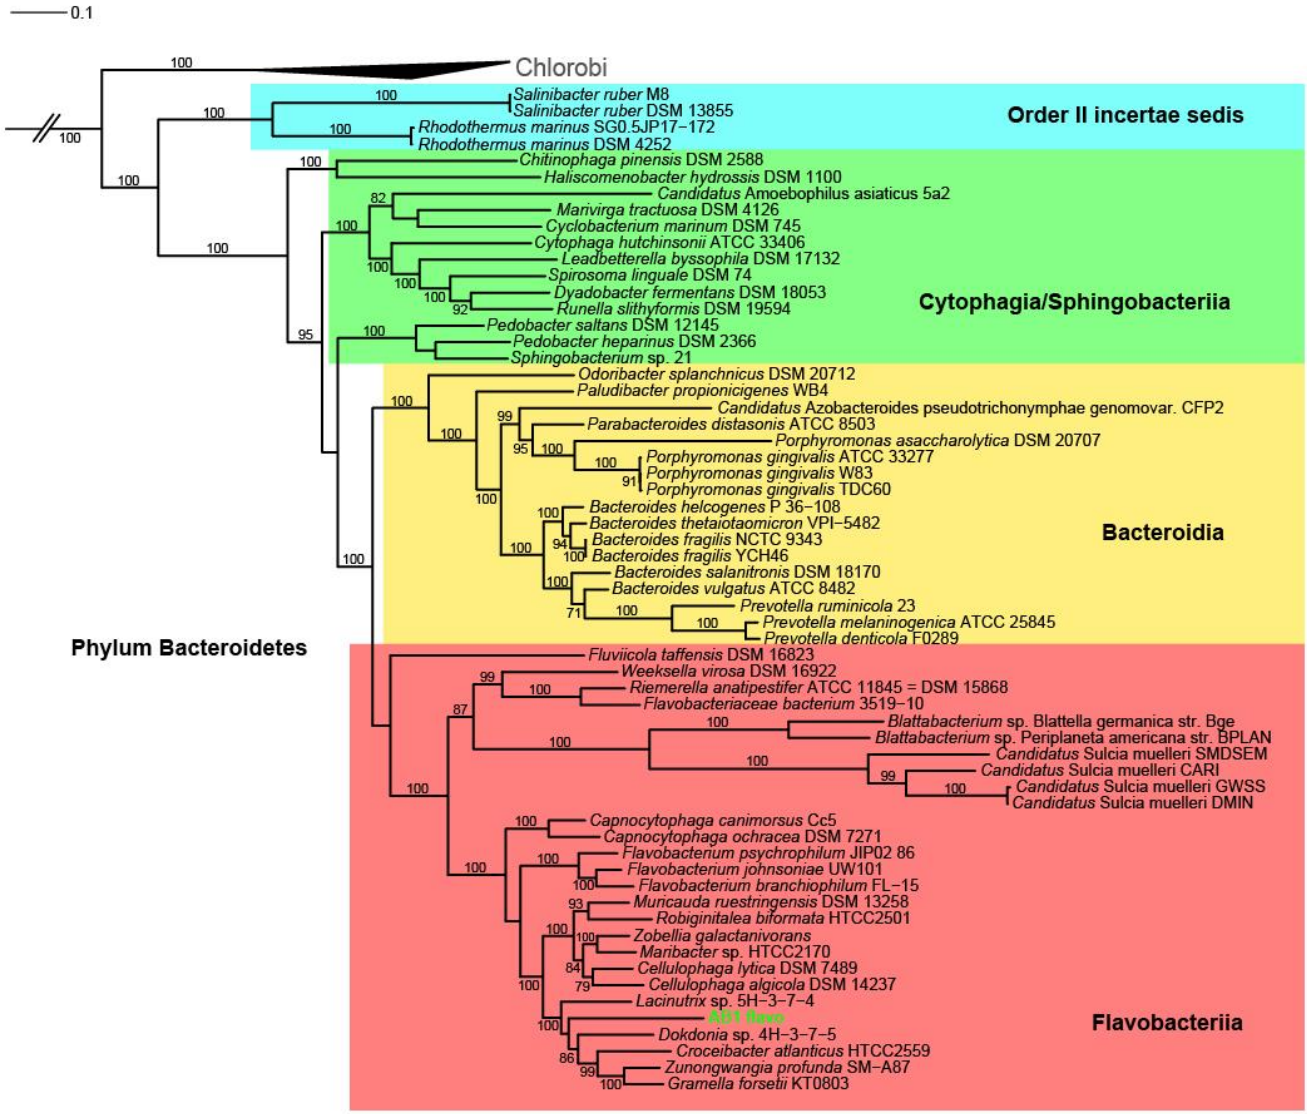

**Supplementary Figure 10:** An approximately maximum likelihood tree generated by FastTree 2 from concatenated single-copy marker gene protein sequences from the AB1\_flavo genome assembly and 1,338 other reference genomes. Bootstrap proportions greater than 70% are expressed to the left of each node as a percentage of 1,000 replicates.

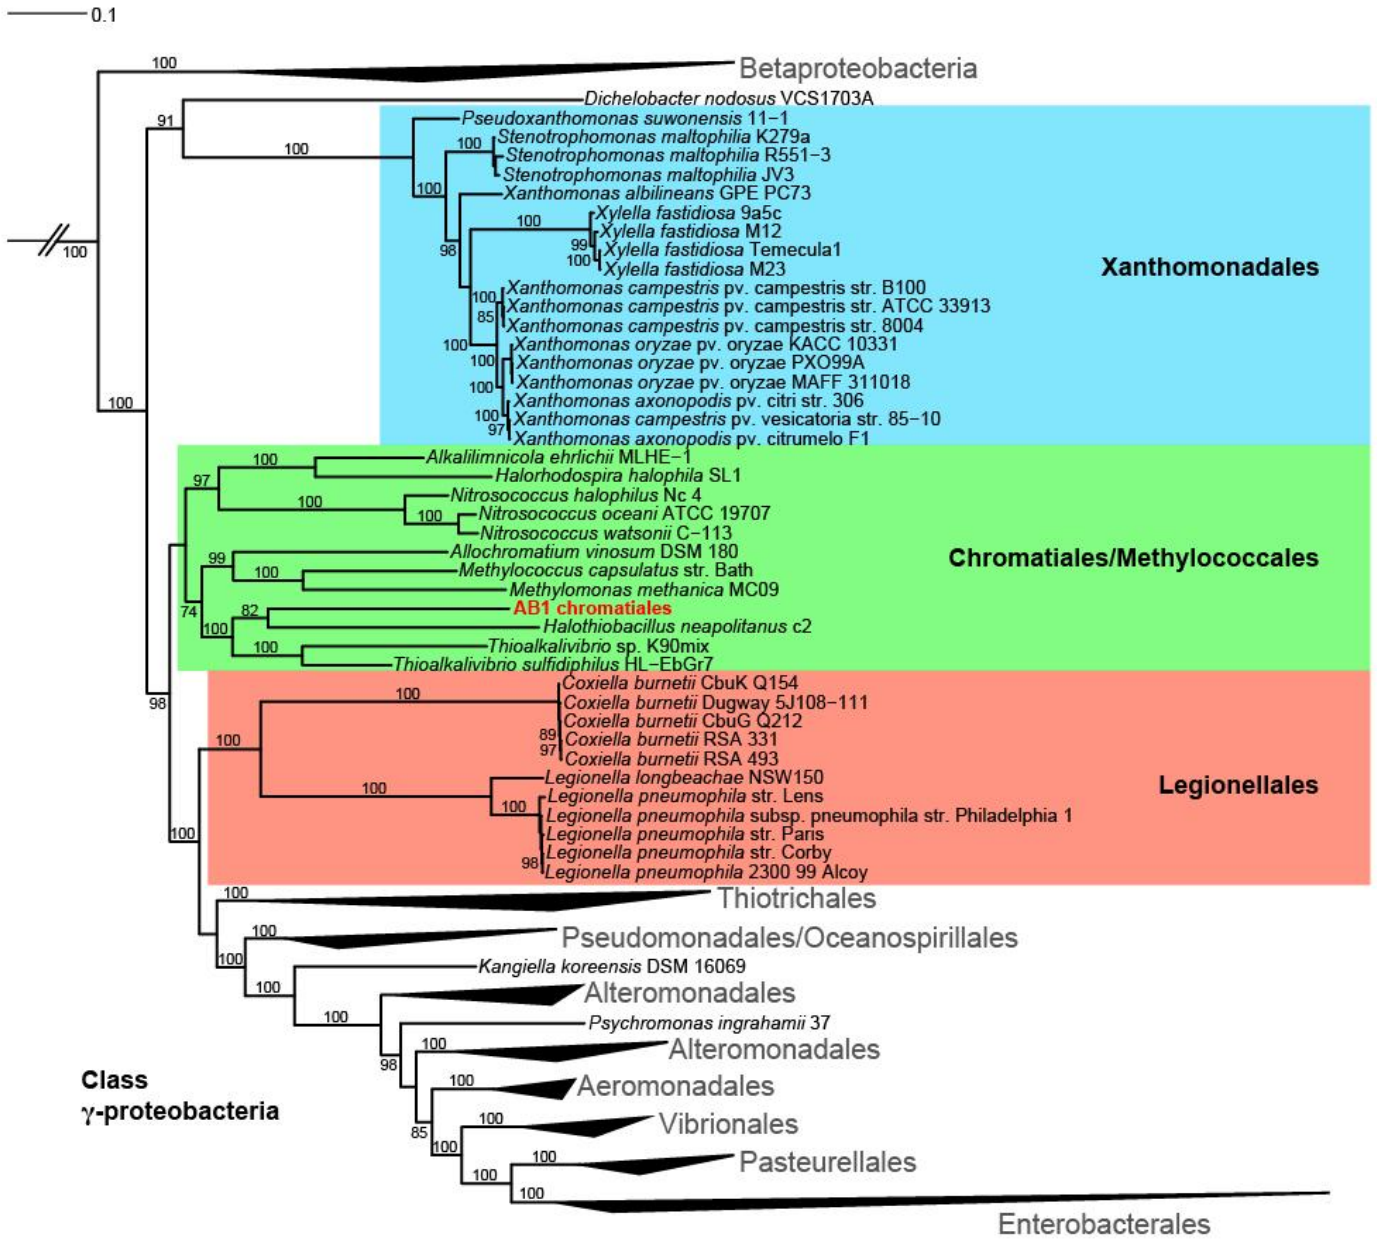

**Supplementary Figure 11:** An approximately maximum likelihood tree generated by FastTree 2 from concatenated single-copy marker gene protein sequences from the AB1\_chromatiales genome assembly and 1,336 other reference genomes. Bootstrap proportions greater than 70% are expressed to the left of each node as a percentage of 1,000 replicates.

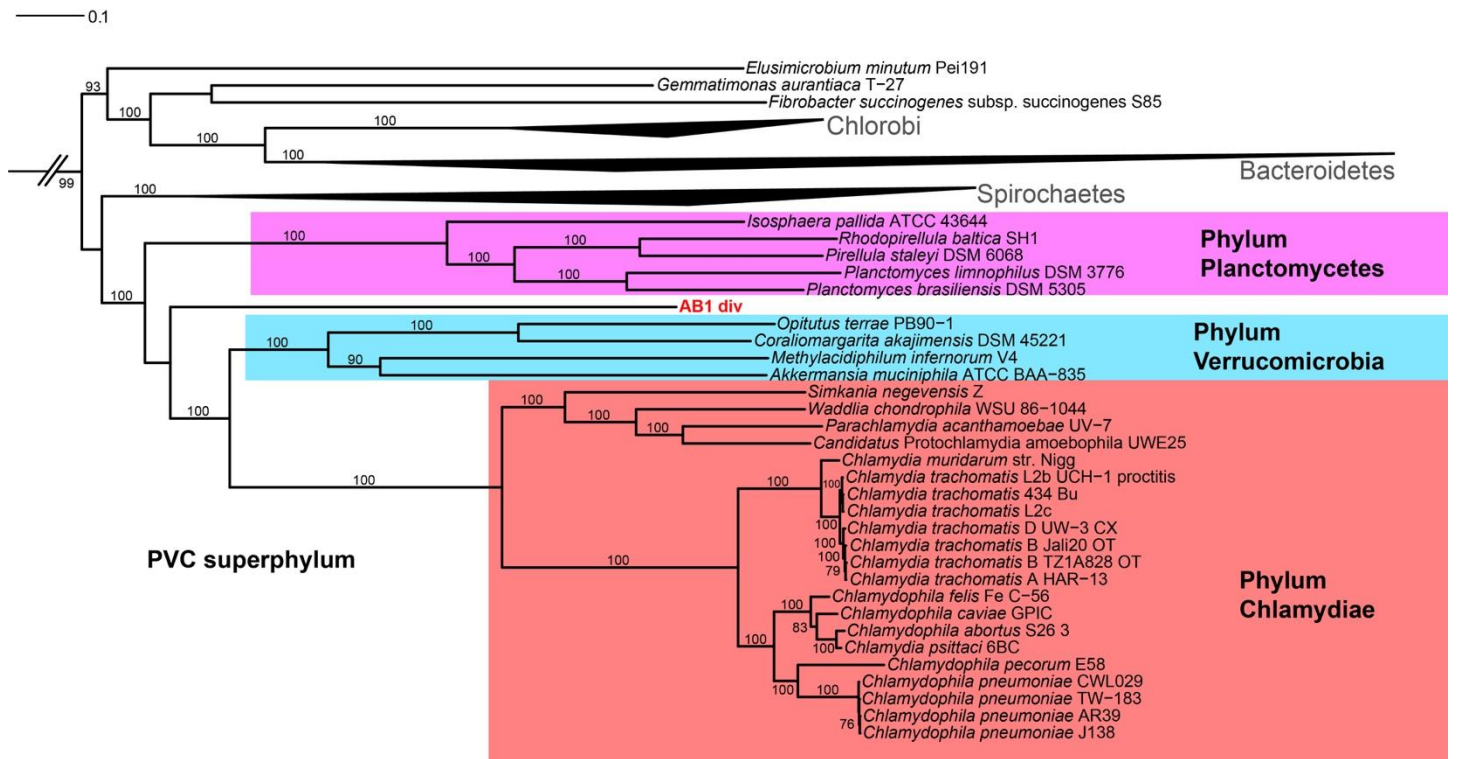

**Supplementary Figure 12:** An approximately maximum likelihood tree generated by FastTree 2 from concatenated single-copy marker gene protein sequences from the AB1\_div genome assembly and 1,336 other reference genomes. Bootstrap proportions greater than 70% are expressed to the left of each node as a percentage of 1,000 replicates.

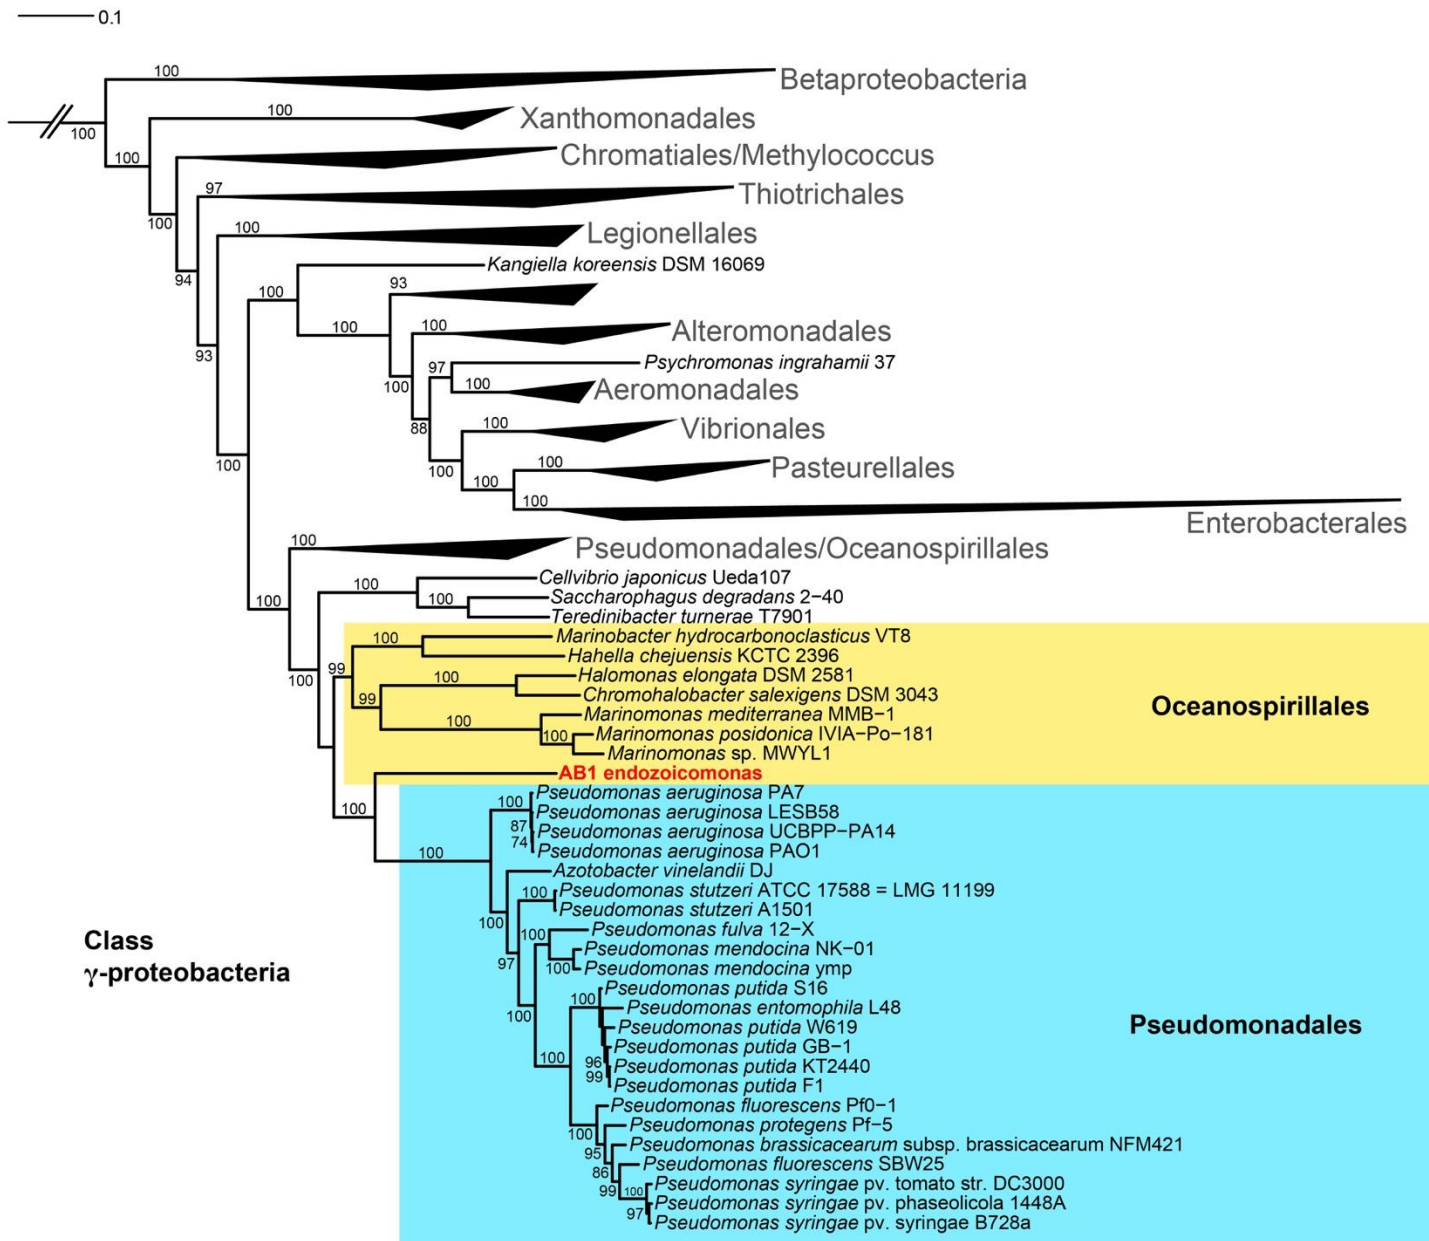

**Supplementary Figure 13:** An approximately maximum likelihood tree generated by FastTree 2 from concatenated single-copy marker gene protein sequences from the AB1\_endozoicomonas genome assembly and 1,333 other reference genomes. Bootstrap proportions greater than 70% are expressed to the left of each node as a percentage of 1,000 replicates.





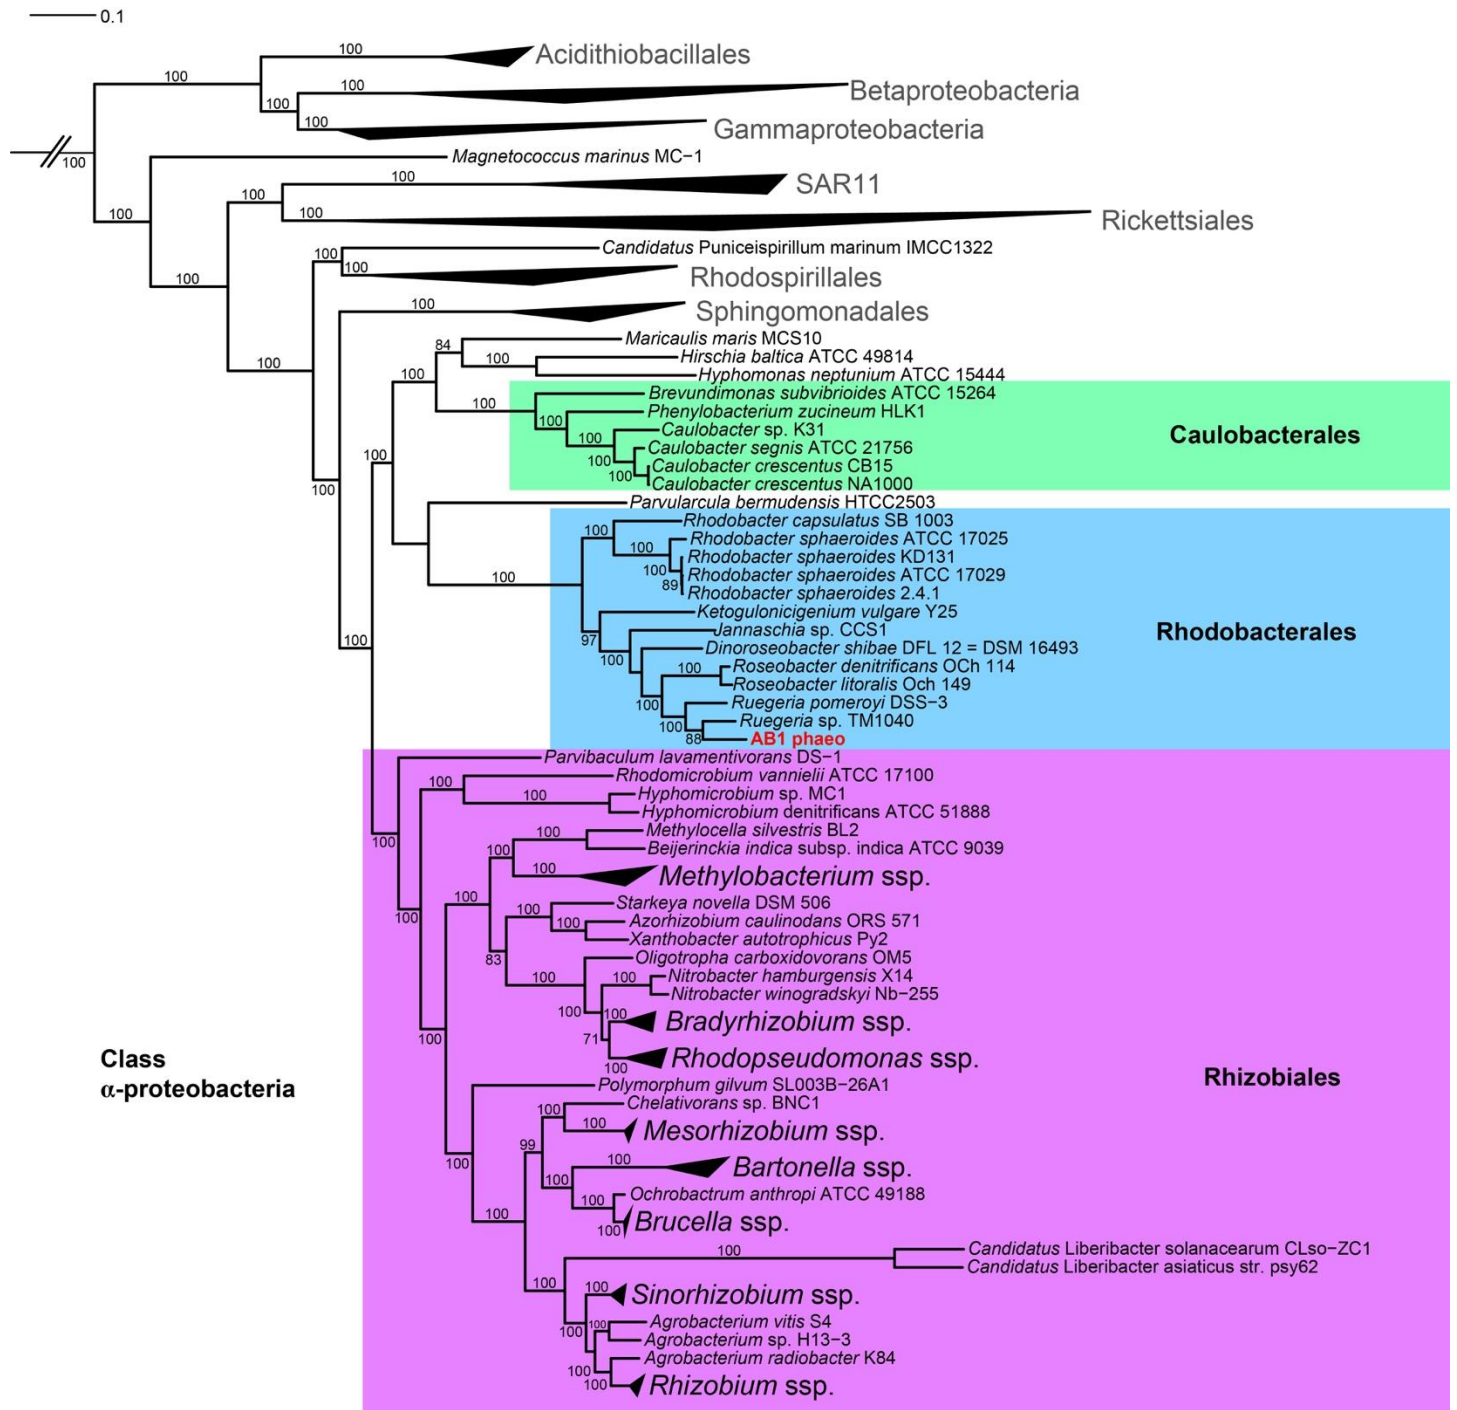

**Supplementary Figure 15:** An approximately maximum likelihood tree generated by FastTree 2 from concatenated single-copy marker gene protein sequences from the AB1\_phaeo genome assembly and 1,336 other reference genomes. Bootstrap proportions greater than 70% are expressed to the left of each node as a percentage of 1,000 replicates.

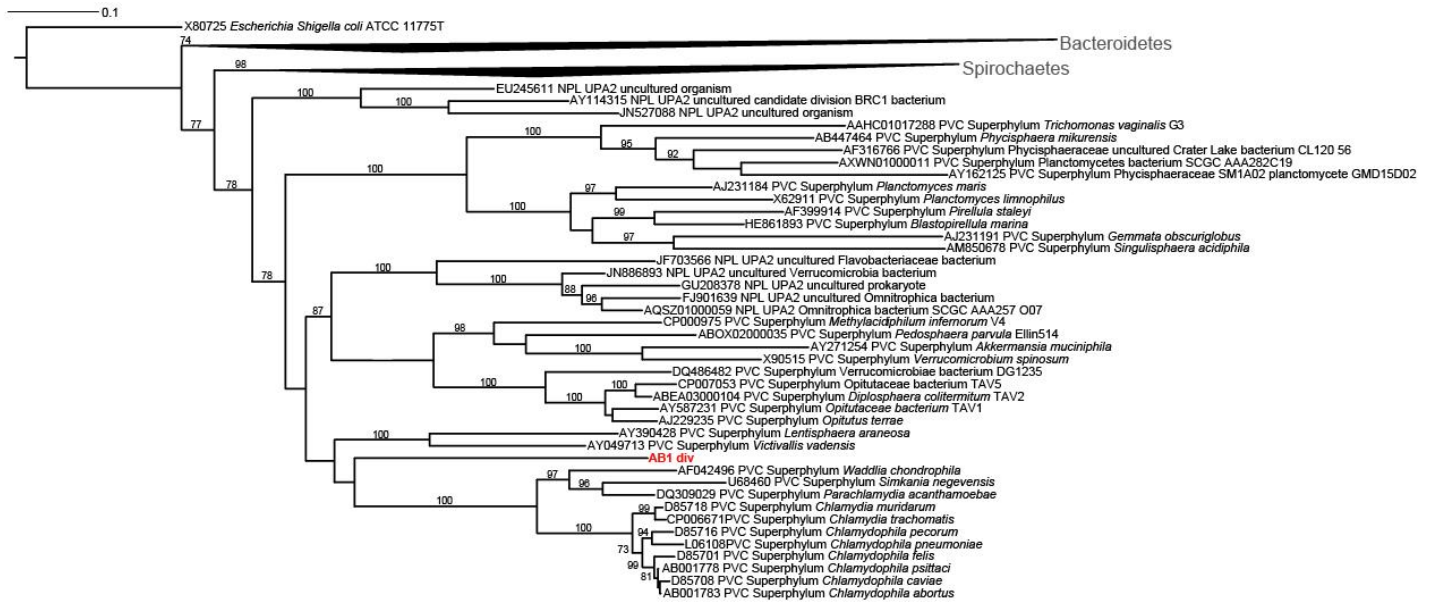

**Supplementary Figure 16:** An approximately maximum likelihood tree generated by FastTree 2 based on the 16S rRNA gene in the AB1\_div genome assembly and 272 other reference sequences. Bootstrap proportions greater than 70% are expressed to the left of each node as a percentage of 1,000 replicates.

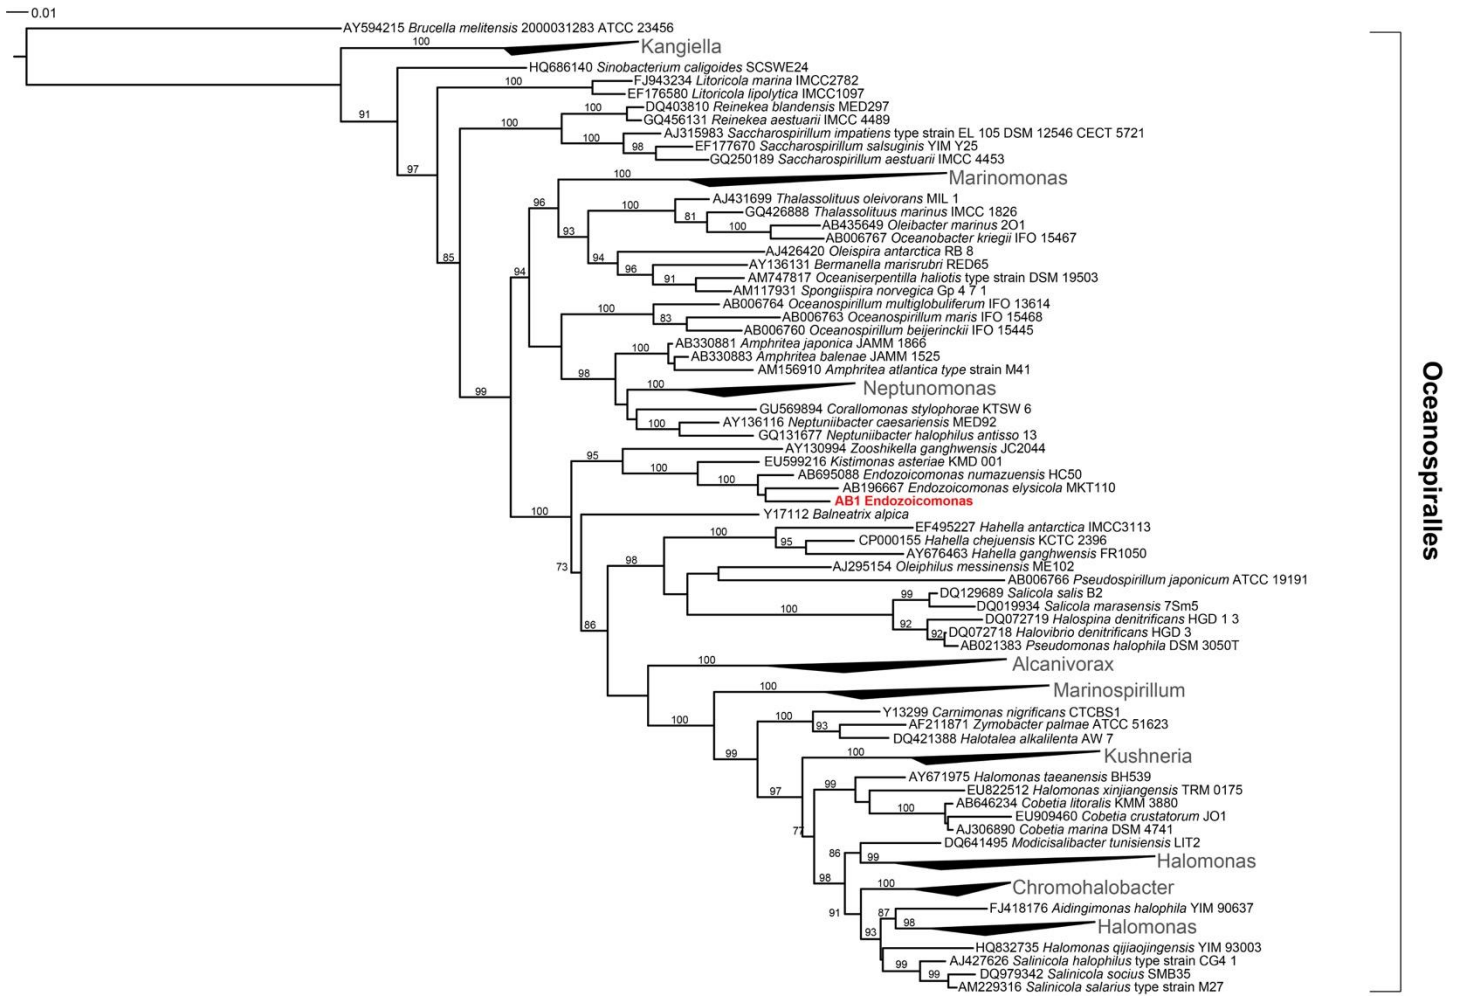

**Supplementary Figure 17:** An approximately maximum likelihood tree generated by FastTree 2 based on the 16S rRNA gene in the AB1\_endozoicomonas genome assembly and 172 other reference sequences. Bootstrap proportions greater than 70% are expressed to the left of each node as a percentage of 1,000 replicates.

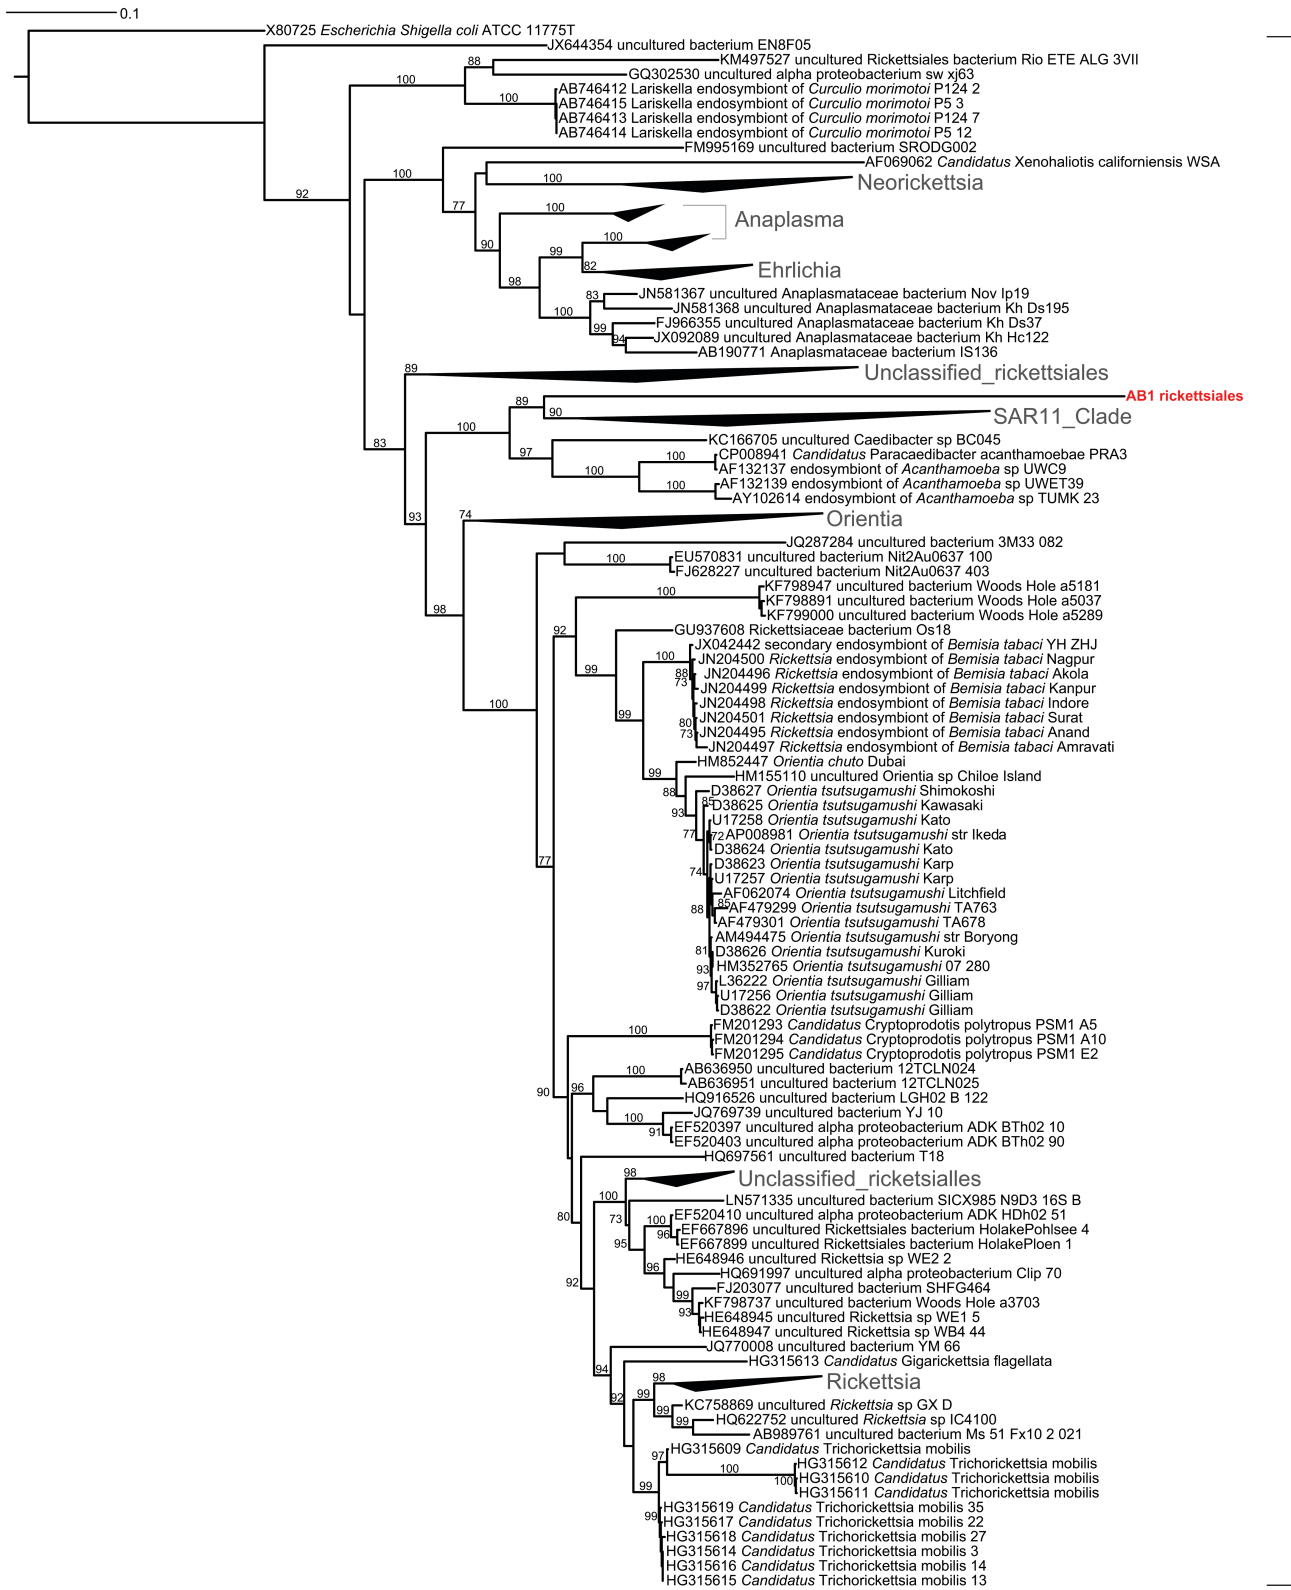

**Supplementary Figure 18:** An approximately maximum likelihood tree generated by FastTree 2 based on the 16S rRNA gene in the AB1\_rickettsiales genome assembly and 691 other reference sequences. Bootstrap proportions greater than 70% are expressed to the left of each node as a percentage of 1,000 replicates.

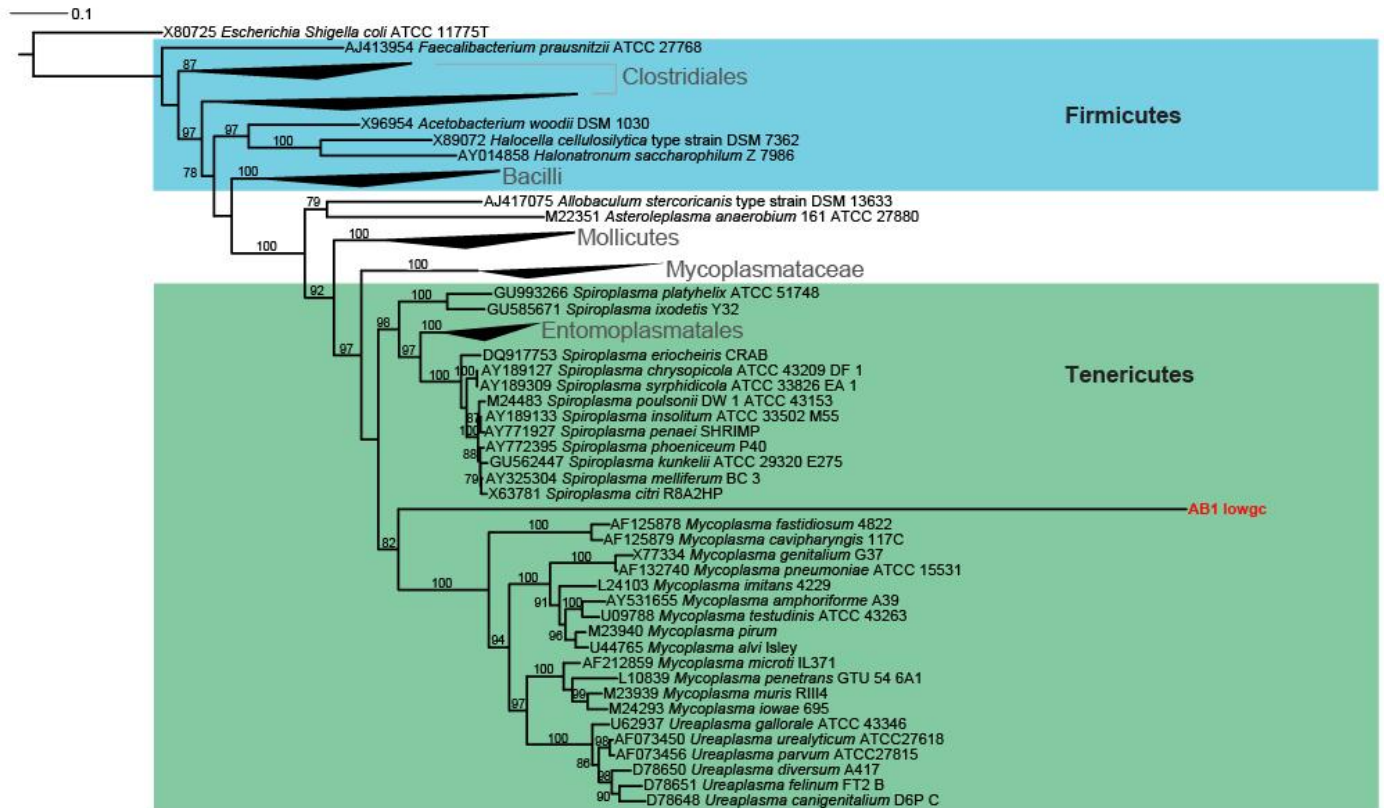

**Supplementary Figure 19:** An approximately maximum likelihood tree generated by FastTree 2 based on the 16S rRNA gene (without the in the AB1\_lowgc genome assembly and 244 other reference sequences). Bootstrap proportions greater than 70% are expressed to the left of each node as a percentage of 1,000 replicates.



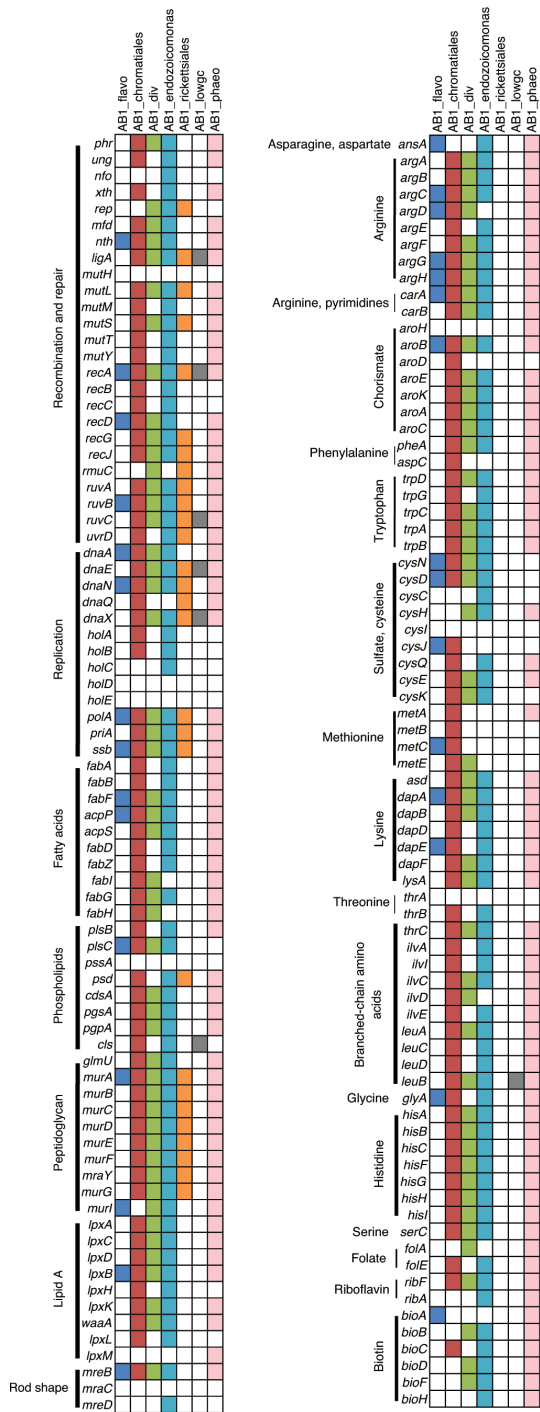

**Supplementary Figure 21: Gene inventory analysis.** Gene content of assembled genome bins. Colored squares show the presence of genes found in annotated genome bins (columns), while white squares indicate an absence of genes (rows).

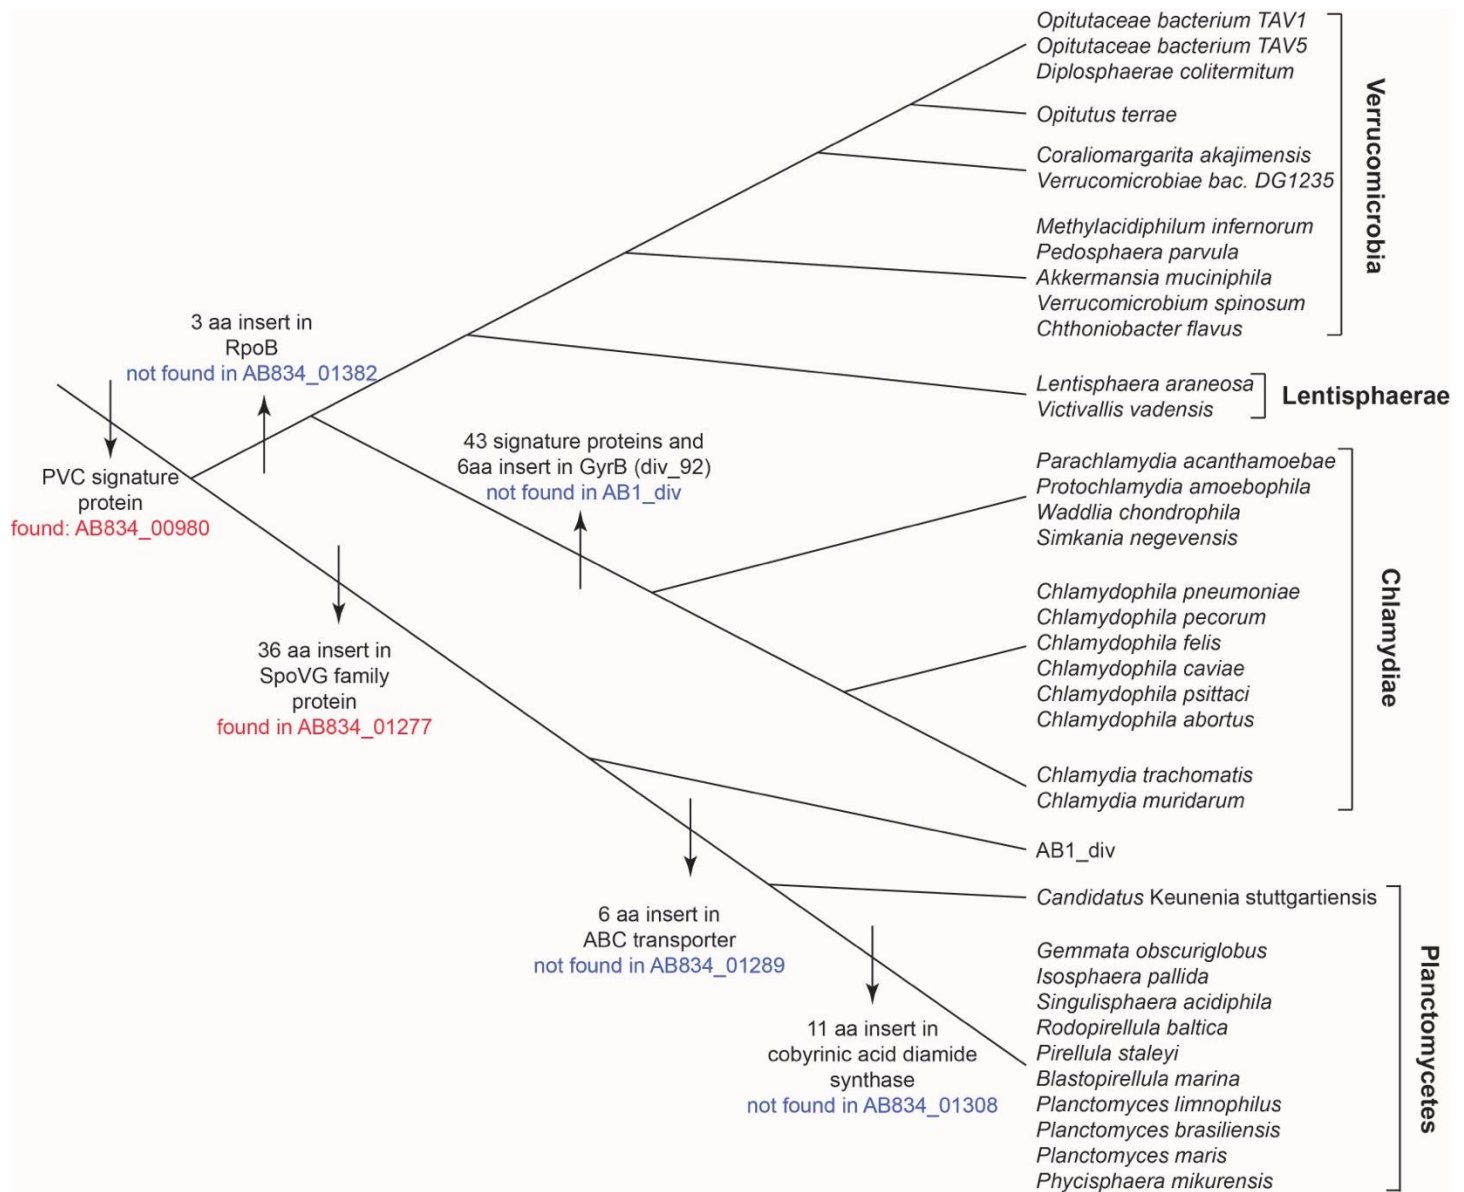

**Supplementary Figure 22: Analysis of signature proteins and indels observed in the AB1\_div genome places it in the PVC superphylum.** A signature protein of the PVC superphylum (29) was found in the AB1\_div assembly (AB384\_00980), and a 36 amino acid insert was found in a SpoVG family protein, previously found to be specific to the phylum Planctomycetes (30). However, other characteristic Planctomyces inserts - in an ABC transporter, and in cobyrrinic acid acdiamide synthase were not found in AB1\_div, suggesting that is a basal branch of the Planctomycetes lineage, which is consistent with 16S identity (highest identity is 78% to Planctomyces sequences in the SILVA database). A 3 amino acid insert in RpoB, characteristic of Verrucomicrobia, Lentisphaerae and Chlamydiae (30) was not found in AB1\_div, and 43 signature proteins found to be specific to Chlamydiae (31) were also not found in AB1\_div.



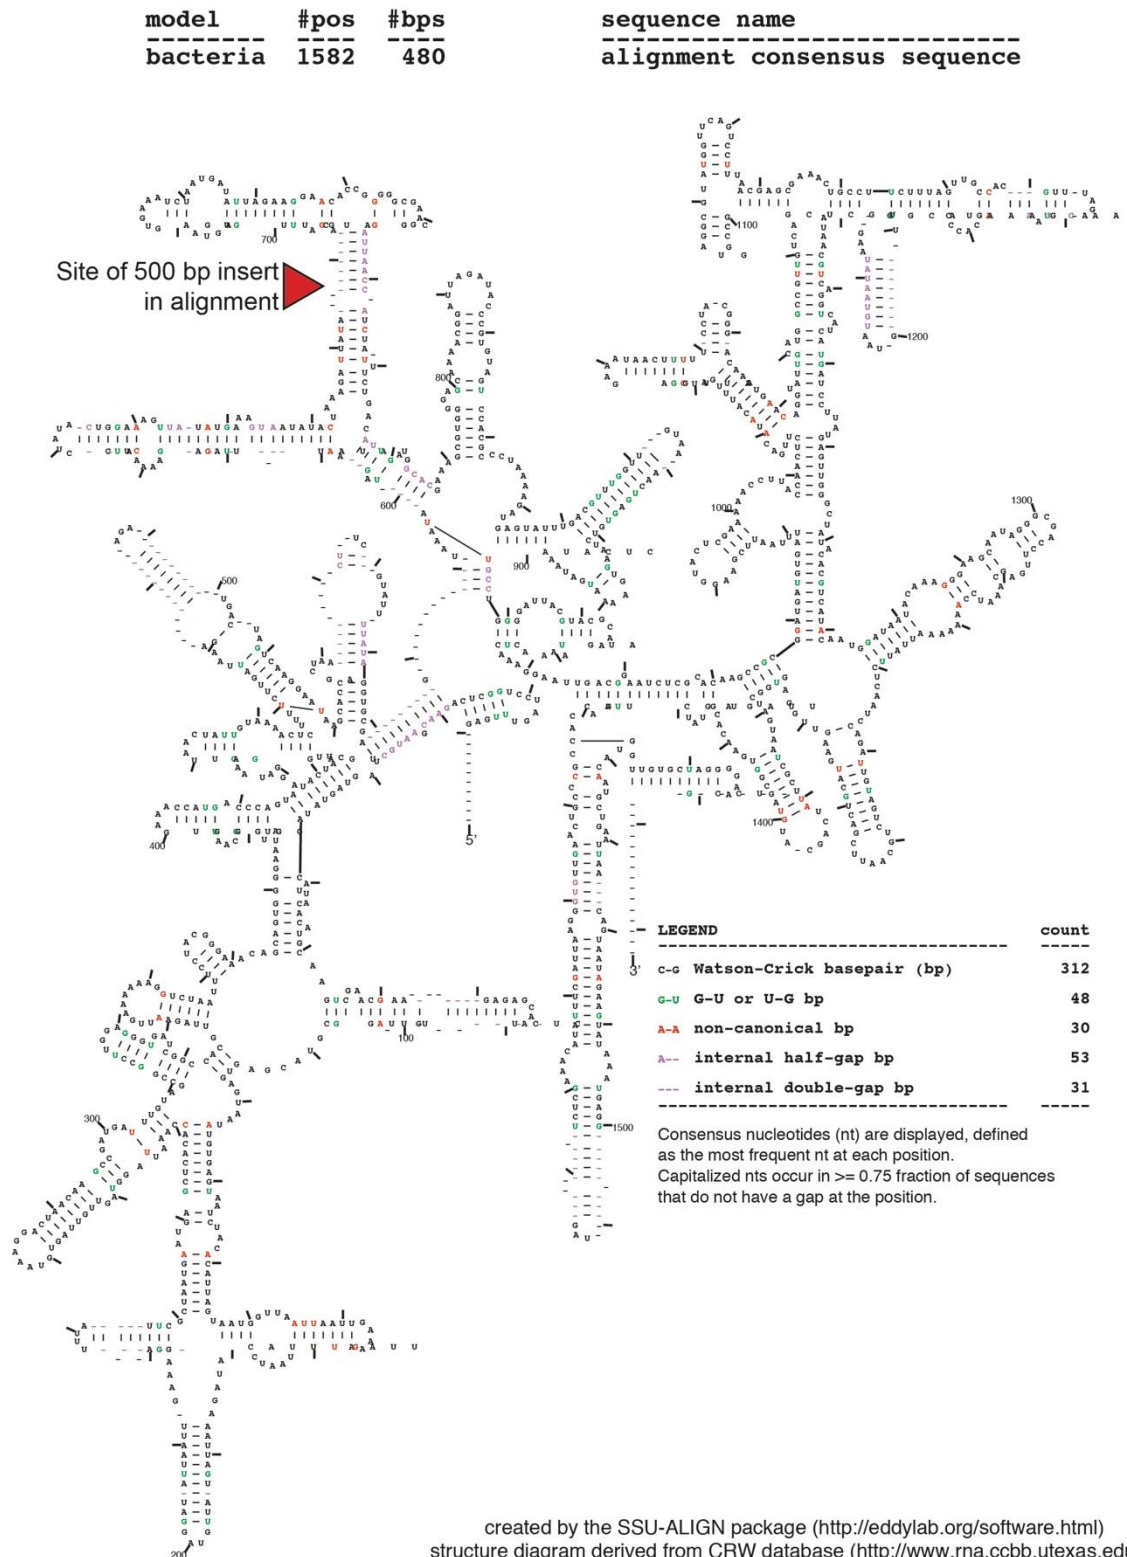

**Supplementary Figure 23:** Alignment of AB1\_lowgc 16S sequence to a structural model of the bacterial small ribosomal subunit, constructed with SSU-Align (19). The location of the 500 bp intervening sequence in the alignment is shown.

# SpoVG family protein

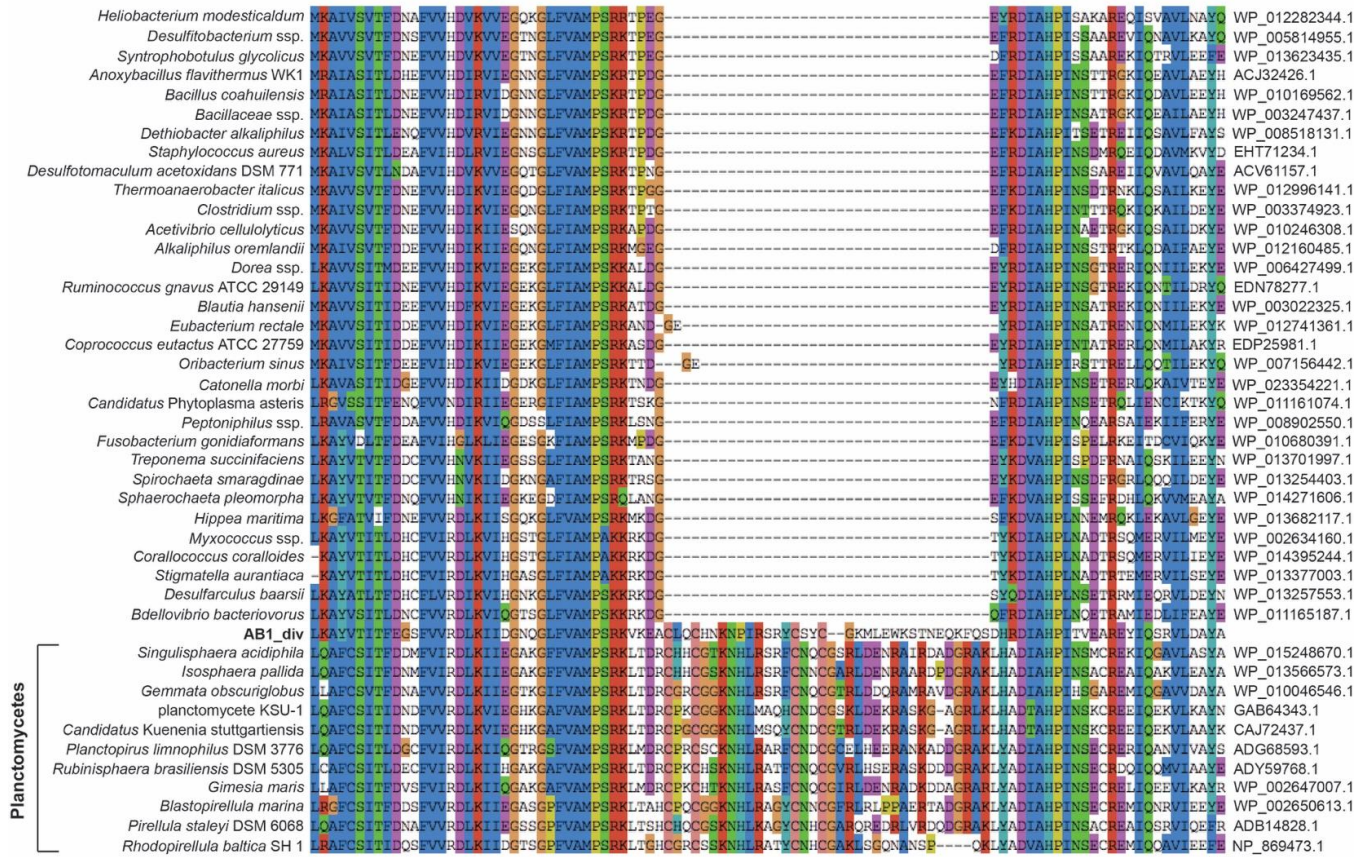

**Supplementary Figure 24: Protein alignment of SpoVG family protein, showing region with 36 amino acid insert specific for the Planctomyces branch of the PVC superphylum.**

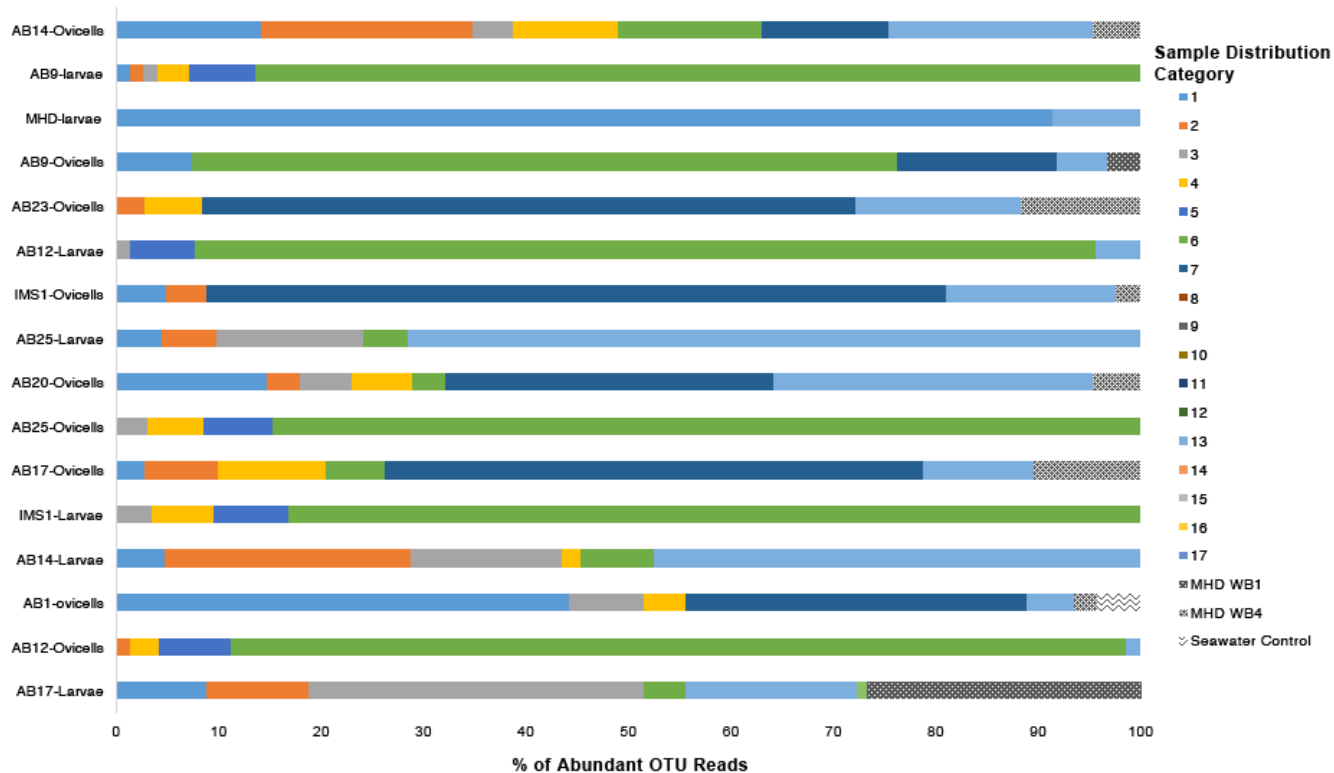

**Supplementary Figure 25: Distribution of abundant (> 1%) bacterial OTUs in *Bugula neritina*, *Bugula Stolonifera* and control seawater.** The distribution category reflects the number of samples in which a given abundant OTU appears in *B. neritina* samples; if the OTU was also found at abundant levels in *B. stolonifera* (MHD WB1 and MHD WB4) or the seawater control, then it was placed into those respective categories. 44.2% of reads corresponding to abundant bacteria in the AB1\_ovicells sample were not detected in any other of the samples subjected to 16S amplicon sequencing.

**Supplementary Table 1.** Sequence datasets and assembly characteristics

| <b>Method of Analysis</b>                    | <b>AB1_ovicells</b> | <b>MHD_larvae</b> |
|----------------------------------------------|---------------------|-------------------|
| <b>16S PCR sequencing</b>                    |                     |                   |
| Illumina MiSeq reads (2 × 251 bp), thousands | 429                 | 382               |
| <b>Whole metagenome sequencing</b>           |                     |                   |
| Illumina HiSeq reads (2 × 101 bp), millions  | 404.5               | 219               |
| Illumina HiSeq reads (2 × 101 bp), Gbp       | 55.8                | 22.1              |
| Total assembly, thousands of contigs         | 591.8               | 505.9             |
| Total assembly, Mbp                          | 498.5               | 435               |
| Total assembly, N50, bp                      | 2,632               | 1,638             |
| Contigs >3 kbp, thousands                    | 27.6                | 19.0              |
| Contigs >3 kbp, Mbp                          | 237.6               | 172.3             |
| Bacterial contigs >3 kbp                     | 6,372               |                   |
| Bacterial contigs >3 kbp, Mbp                | 56.3                |                   |
| <b>Whole metatranscriptome sequencing</b>    |                     |                   |
| Illumina HiSeq reads (2 × 101 bp), millions  | 118                 |                   |
| Illumina HiSeq reads (2 × 101 bp), Gbp       | 11.9                |                   |
| Illumina HiSeq reads (2 × 151 bp), millions  | 357                 |                   |
| Illumina HiSeq reads (2 × 151 bp), Gb        | 53.9                |                   |

**Supplementary Table 2:** Bacterial 16S rRNA sequences reconstructed from the AB1\_ovicells metagenomic reads directly by EMIRGE (35) and their assigned genome bin, where they have been joined to assemblies with PCR and Sanger sequencing. Note: The 16S sequences of AB1\_rickettsiales and AB1\_lowgc that were assembled *de novo* were not reconstructed by EMIRGE, likely because of their divergence from sequences in the SILVA database (26).

| <b>Sequence</b> | <b>Relative Abundance</b> | <b>Best BLASTN hit (accession, identity)</b>                             | <b>RDP classification (confidence)</b> | <b>Assigned genome bin</b> |
|-----------------|---------------------------|--------------------------------------------------------------------------|----------------------------------------|----------------------------|
| 41              | 0.45                      | Uncultured bacterium clone BA100-C1-seq (JX280191.1, 97%)                | Genus: <i>Endozoicomonas</i> (100%)    | AB1_endozoicomonas         |
| 4019            | 0.12                      | Uncultured Rhodobacteraceae bacterium clone MD2.45 (FJ403094.1, 96%)     | Genus: <i>Roseovarius</i> (99%)        |                            |
| 96              | 0.10                      | Endobugula sertula strain BnSP (AF006606.2, 99%)                         | Genus: <i>Eionea</i> (99%)             | AB1_endobugula             |
| 199             | 0.089                     | Uncultured bacterium clone SanDiego a7349 (KF799885.1, 92%)              | Genus: <i>Phaeobacter</i> (41%)        | AB1_phaeo                  |
| 128             | 0.062                     | Uncultured gamma proteobacterium clone 27D24 (GQ274161.1, 96%)           | Genus: <i>Bermanella</i> (33%)         |                            |
| 145             | 0.058                     | Uncultured bacterium clone 5S1 (JF272174.1, 96%)                         | Genus: <i>Granulosicoccus</i> (100%)   |                            |
| 281             | 0.041                     | Uncultured organism clone ctg CGOFF0066 (DQ395743.1, 91%)                | Genus: <i>Parachlamydia</i> (27%)      | AB1_div                    |
| 164             | 0.041                     | Uncultured Sphingobacteriales bacterium clone B255 A11 (EF092220.1, 96%) | Genus: <i>Nitritalea</i> (11%)         |                            |
| 233             | 0.033                     | <i>Amphritea</i> sp. MEBiC05461T 16S (GU289646.1, 98%)                   | Genus: <i>Amphritea</i> (100%)         |                            |

**Supplementary Table 3:** Automated MaxBin (41) binning results for AB1\_ovicells bacterial contigs >3 kbp, displaying a high number of repeated markers compared to binning based on normal mixture modeling (11) (**Main Paper, Table 1**).

| <i>Cluster Name/Number</i>    | <i>Relative Abundance</i> | <i>Completeness (%)</i> | <i>Genome size (bp)</i> | <i>GC content (%)</i> | <i>No. Repeated markers</i> | <i>No. contigs</i> |
|-------------------------------|---------------------------|-------------------------|-------------------------|-----------------------|-----------------------------|--------------------|
| AB1_bacteria_over3k.001.fasta | 23.89                     | 94.40%                  | 4164677                 | 35                    | 8                           | 313                |
| AB1_bacteria_over3k.002.fasta | 17.24                     | 44.90%                  | 1007589                 | 21                    | 16                          | 29                 |
| AB1_bacteria_over3k.003.fasta | 6.04                      | 100.00%                 | 4869462                 | 45                    | 40                          | 399                |
| AB1_bacteria_over3k.004.fasta | 4.12                      | 94.40%                  | 4750895                 | 42                    | 45                          | 483                |
| AB1_bacteria_over3k.005.fasta | 2.93                      | 68.20%                  | 3707167                 | 41                    | 18                          | 514                |
| AB1_bacteria_over3k.006.fasta | 2.7                       | 96.30%                  | 5119588                 | 60                    | 13                          | 321                |
| AB1_bacteria_over3k.007.fasta | 1.97                      | 38.30%                  | 2772797                 | 34                    | 6                           | 435                |
| AB1_bacteria_over3k.008.fasta | 1.78                      | 13.10%                  | 1725527                 | 39                    | 1                           | 237                |
| AB1_bacteria_over3k.009.fasta | 1.61                      | 17.80%                  | 2086909                 | 43                    | 6                           | 452                |
| AB1_bacteria_over3k.010.fasta | 1.41                      | 57.90%                  | 6393031                 | 51                    | 30                          | 1309               |

**Supplementary Table 4:** Primers used in this study

| <b>Name</b>          | <b>Sequence</b>        | <b>Citation</b>                  | <b>Notes</b>                                                                                                        |
|----------------------|------------------------|----------------------------------|---------------------------------------------------------------------------------------------------------------------|
| S-D-Bact-0341-b-S-17 | CCTACGGGNGGCWGCAG      | Klindworth<br><i>et al. (38)</i> | 16S rRNA amplicon sequencing                                                                                        |
| S-D-Bact-0785-a-A-21 | GACTACHVGGGTATCTAATCC  | Klindworth<br><i>et al. (38)</i> | 16S rRNA amplicon sequencing                                                                                        |
| AB1_div_F            | CTAGTTATGTAGTTCTGG     | This study                       | Detection of AB1_div                                                                                                |
| AB1_div_R            | GGCTTTCGAGTCGTAAAC     | This study                       | Detection of AB1_div                                                                                                |
| AB1_lowGC_16S_576F   | GCTTGTGCGAGATTCCGT     | This study                       | Detection of AB1_lowgc                                                                                              |
| AB1_lowGC_16S_730R   | ACGATTAGATACCCGTG      | This study                       | Detection of AB1_lowgc                                                                                              |
| Bn240f               | TGCTATTTGATGAGCCCGCGTT | Haygood &<br>Davidson<br>(40)    | Detection of <i>Ca. E. sertula</i><br>(AB1_endobugula)                                                              |
| Bn1253r              | CATCGCTGCTTCGCAACCC    | Haygood &<br>Davidson<br>(40)    | Detection of <i>Ca. E. sertula</i><br>(AB1_endobugula)                                                              |
| EndozoiF             | TGCGTAGGCGGCTCGTTAAGTT | This study                       | Detection of<br>AB1_endozoicomonas; Detecting<br>and sanger sequencing of<br>connectivity between 16S and<br>contig |
| EndozoiR             | AATTCGCAGGATGTCAAGGCC  | This study                       | Detection of AB1_endozoicomonas                                                                                     |
| Low1_L2              | AGGTTTAGCAGAATAAGTTGGA | This study                       | Closing circular AB1_lowgc<br>chromosome                                                                            |
| Low1_64_R2           | GGTTTTATAAGCCCTGACCA   | This study                       | Closing circular AB1_lowgc<br>chromosome                                                                            |
| AB1_phaeo_16S_302F   | CTCTTTCGCCTGTGATGATA   | This study                       | Detecting connectivity<br>between AB1_phaeo 16S and<br>contig                                                       |
| Phaeo_ribo_546_R     | CCAAGAAAAATCCATGTCCG   | This study                       | Detecting connectivity<br>between AB1_phaeo 16S and<br>contig                                                       |

|                     |                      |            |                                                                 |
|---------------------|----------------------|------------|-----------------------------------------------------------------|
| AB1_endoz_5S_105R   | CCTACTCTCACATGGGGATA | This study | Detecting connectivity between AB1_endozoicomonas 16S to contig |
| AB1_lowcov_5S_608R* | ATCGCTTTTACTGCCTAGTT | This study | Detecting connectivity between AB1_rickettsiales 16S and contig |
| AB1_lowcov_235F*    | GATTGTAGCTGGTCTGAGAG | This study | Detecting connectivity between AB1_rickettsiales 16S and contig |

**\*Note:** We initially referred to the AB1\_rickettsiales genome as “AB1\_lowcov,” and so these primer names are derived from the original bin name.

**Supplementary Table 5:** Presence of universal bacterial 16S primer and probe binding sites in genome bins. Dashes denote situations where the EMIRGE (35) reconstructed 16S rRNA sequence does not extend to the primer binding site.

| <i>Bin</i>         | <i>27F</i><br>(36) | <i>1492R</i><br>(37) | <i>S-D-Bact-0341-b-2-17</i><br>(38) | <i>S-D-Bact-0785-a-A-21</i> (38) | <i>EUB338</i><br>(39) |
|--------------------|--------------------|----------------------|-------------------------------------|----------------------------------|-----------------------|
| AB1_div            | YES                | NO                   | YES                                 | YES                              | NO                    |
| AB1_endozoicomonas | -                  | -                    | YES                                 | YES                              | YES                   |
| AB1_endobugula     | -                  | -                    | YES                                 | YES                              | YES                   |
| AB1_rickettsiales  | YES                | NO                   | YES                                 | YES                              | NO                    |
| AB1_lowgc          | YES                | NO                   | NO                                  | YES                              | NO                    |
| AB1_phaeo          | -                  | -                    | YES                                 | YES                              | YES                   |

**Supplementary Table 6:** Genome bin characteristics, prior to iterative assembly

| <i>Bin</i>        | <i>No. Contigs</i> | <i>Size (Mbp)</i> | <i>N50 (kpb)</i> | <i>Longest Contig (kpb)</i> | <i>Coverage*</i> | <i>GC%</i> | <i>Completeness (%)</i> | <i>No. Duplicate markers</i> |
|-------------------|--------------------|-------------------|------------------|-----------------------------|------------------|------------|-------------------------|------------------------------|
| AB1_chromatiales  | 352                | 7.29              | 34.0             | 209.5                       | 2.4×             | 50.4       | 98.6                    | 2                            |
| AB1_rickettsiales | 25                 | 0.400             | 20.5             | 61.7                        | 2.3×             | 21.4       | 48.9                    | 0                            |
| AB1_phaeo         | 195                | 4.55              | 48.9             | 257                         | 2.9×             | 60.4       | 99.3                    | 3                            |

\* The coverage quoted here is k-mer coverage reported by the SPAdes assembler, where k = 77.



**Supplementary Table 7:** Analysis of genetic code in AB1\_lowgc

|                                     | <b><u>Code 4</u></b><br><b>Average ORF</b><br><b>length (bp)</b> | <b>Average ORF</b><br><b>cscore</b> | <b><u>Code 11</u></b><br><b>Average ORF</b><br><b>length (bp)</b> | <b>Average ORF</b><br><b>cscore</b> |
|-------------------------------------|------------------------------------------------------------------|-------------------------------------|-------------------------------------------------------------------|-------------------------------------|
| AB1_lowgc                           | 850                                                              | 139.1                               | 847                                                               | 143.2                               |
| <i>Ca. Phytoplasma australiense</i> | 794                                                              | 108.8                               | 786                                                               | 116.5                               |
| <i>Mycoplasma pneumoniae</i>        | 975                                                              | 117.1                               | 458                                                               | 55.9                                |

**Supplementary Table 8:** Genome annotation characteristics

| <b>Bin</b>         | <b>No. CDS</b> | <b>No. hypothetical genes</b> | <b>Average CDS size (bp)</b> | <b>No. rRNA</b> | <b>No. tRNA</b> | <b>Coding Density (%)</b> |
|--------------------|----------------|-------------------------------|------------------------------|-----------------|-----------------|---------------------------|
| AB1_endozoicomonas | 3,525          | 1,490                         | 962                          | 2               | 41              | 83.8                      |
| AB1_phaeo          | 4,425          | 1,882                         | 921                          | 1               | 40              | 87.2                      |
| AB1_lowgc          | 610            | 481                           | 840                          | 2               | 30              | 86.4                      |
| AB1_rickettsiales  | 409            | 186                           | 951                          | 2               | 38              | 89.3                      |
| AB1_div            | 1,341          | 531                           | 1,119                        | 3               | 88              | 78.7                      |
| AB1_flavo          | 1,522          | 1,052                         | 751                          | 0               | 7               | 71.7                      |
| AB1_chromatiales   | 6,560          | 2,797                         | 977                          | 0               | 39              | 86.2                      |
